# Supplementary figures and images for: Photo- and thermo-responsive microgels with supramolecular crosslinks for wavelength tunability of the volume phase transition temperature
Source: Royal Society of Chemistry journal article supplement (doi:10.1039/d2cp00532h), 2022-01-01

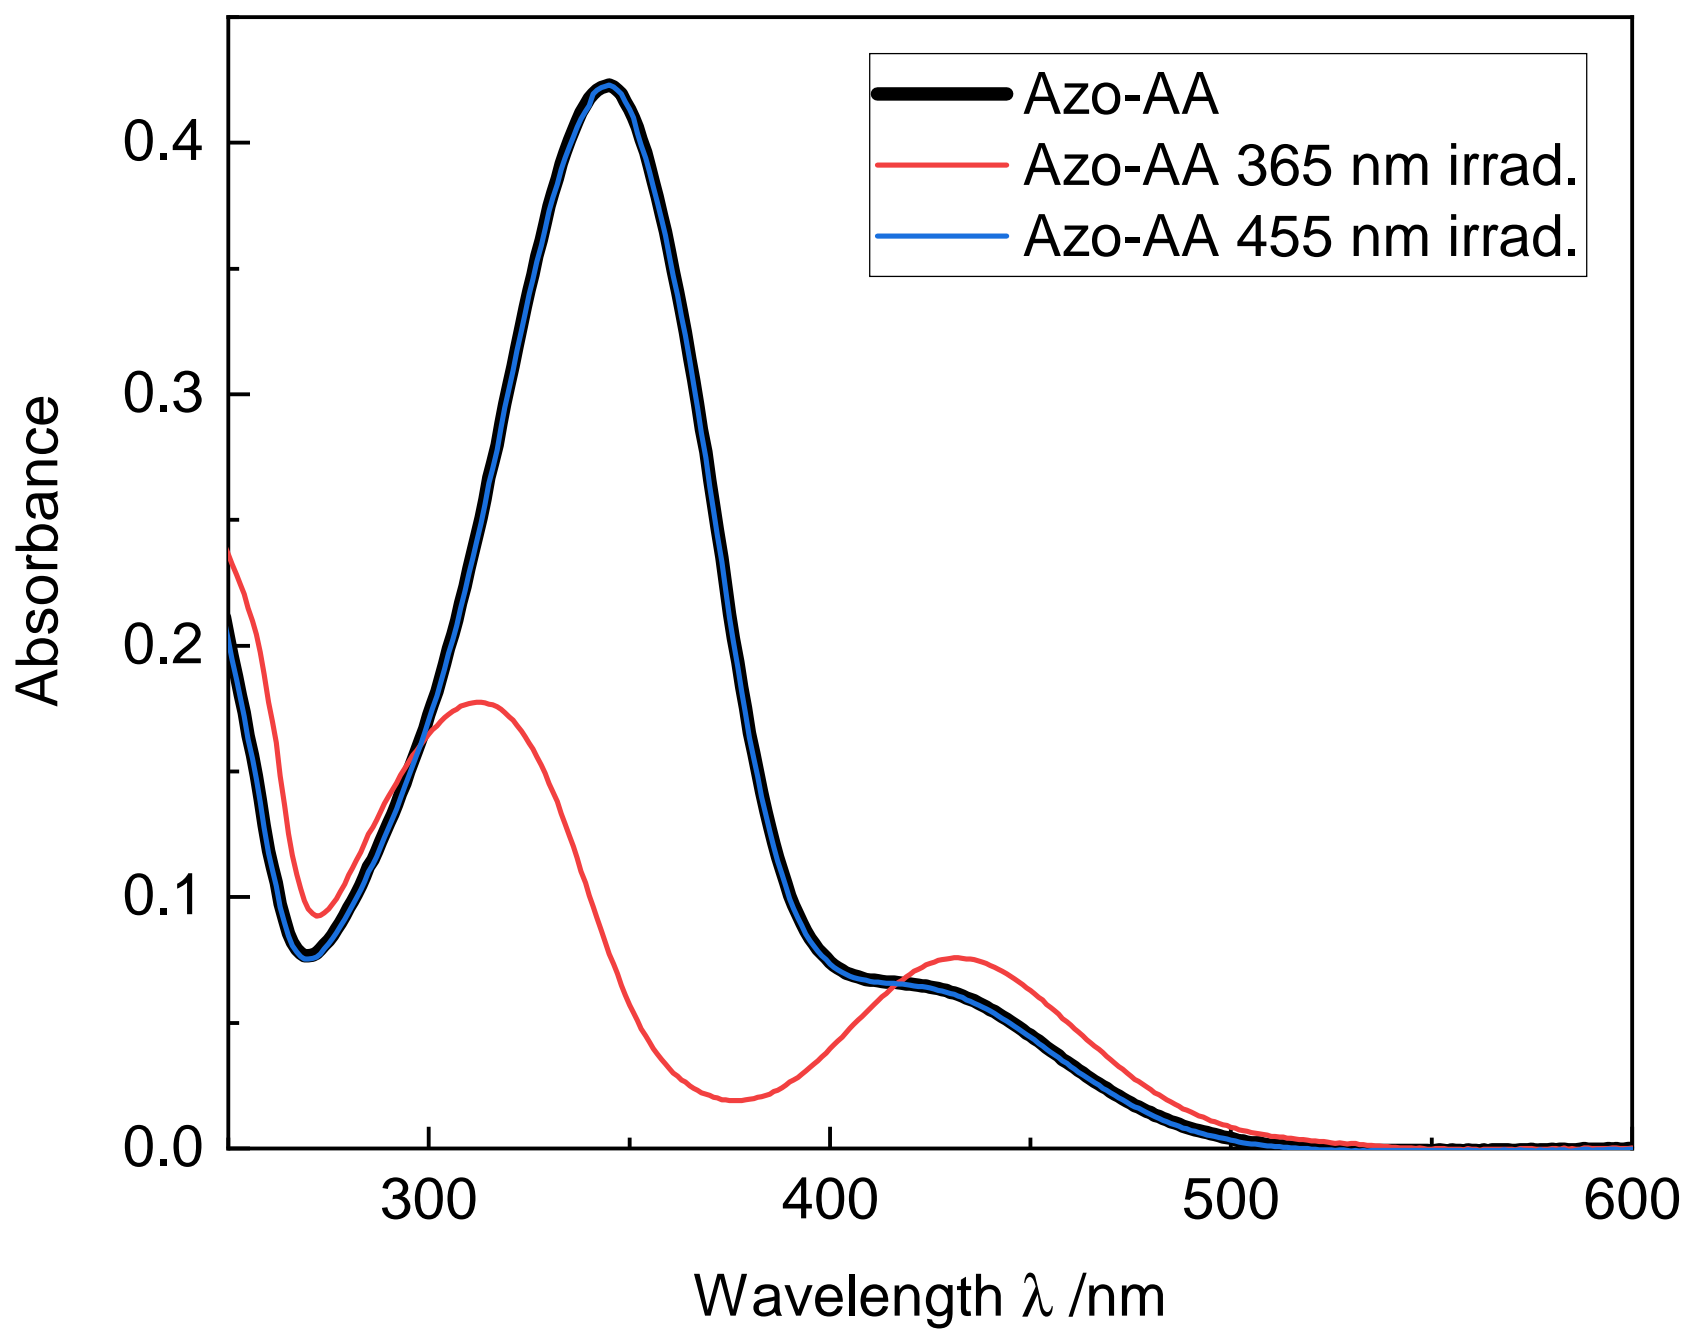

Supplement: d2cp00532h1.zip [file d2cp00532h1.zip]

(a)

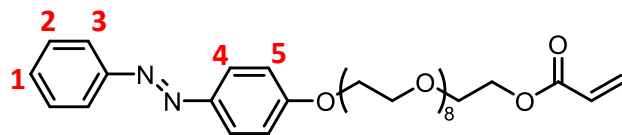

(b)

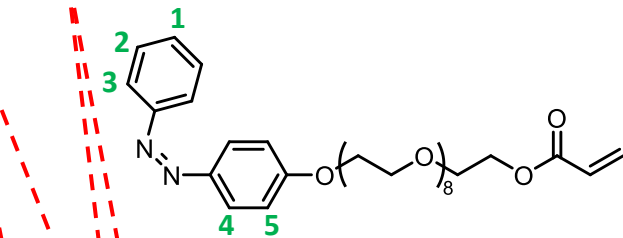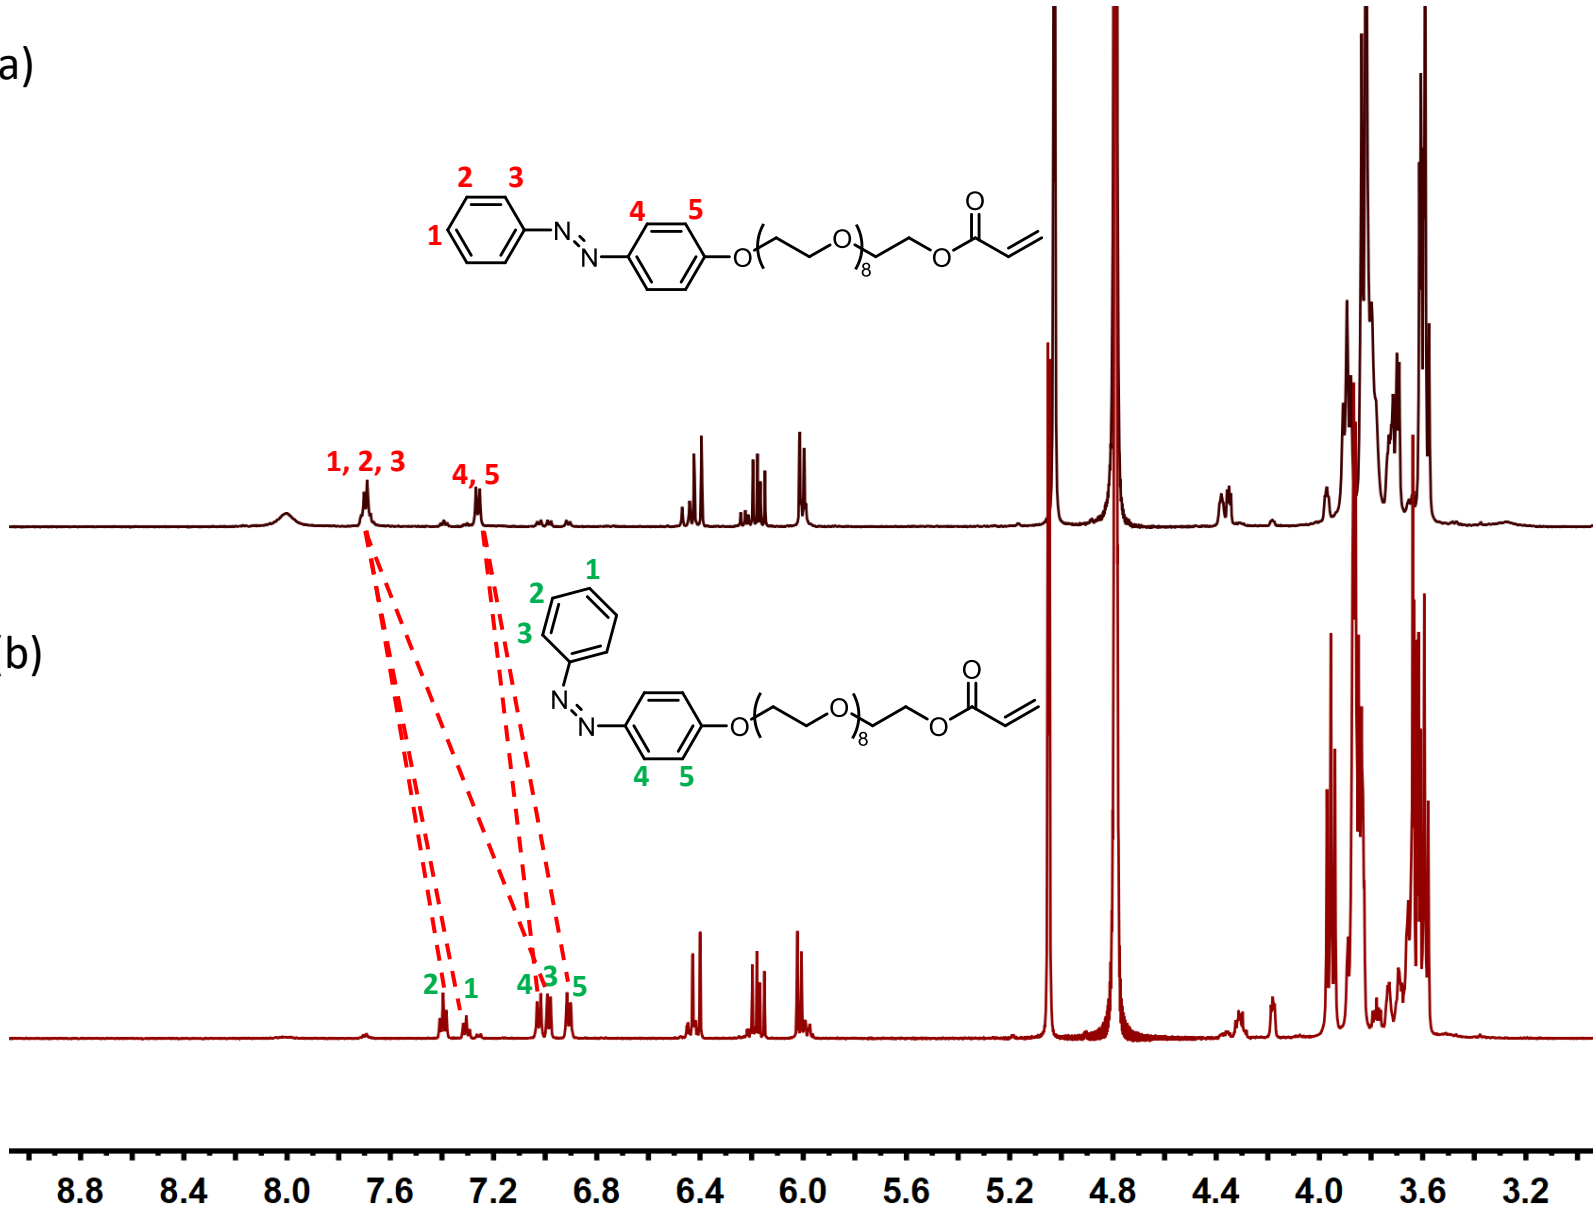

Supplement: d2cp00532h1.zip [file d2cp00532h1.zip]

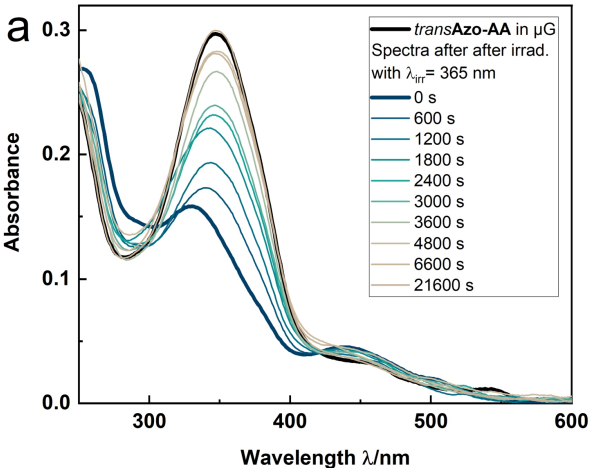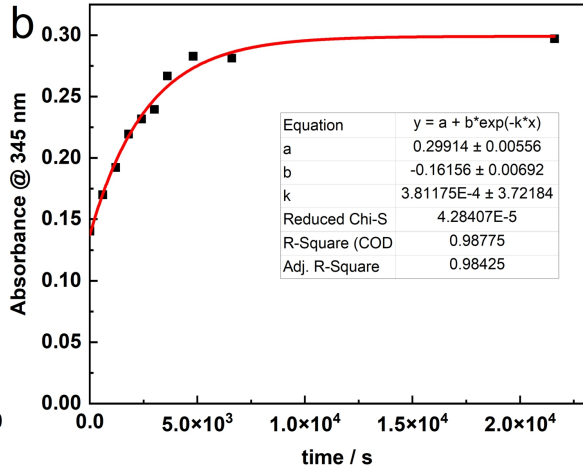

Supplement: d2cp00532h1.zip [file d2cp00532h1.zip]

Scattering intensity/a.u.

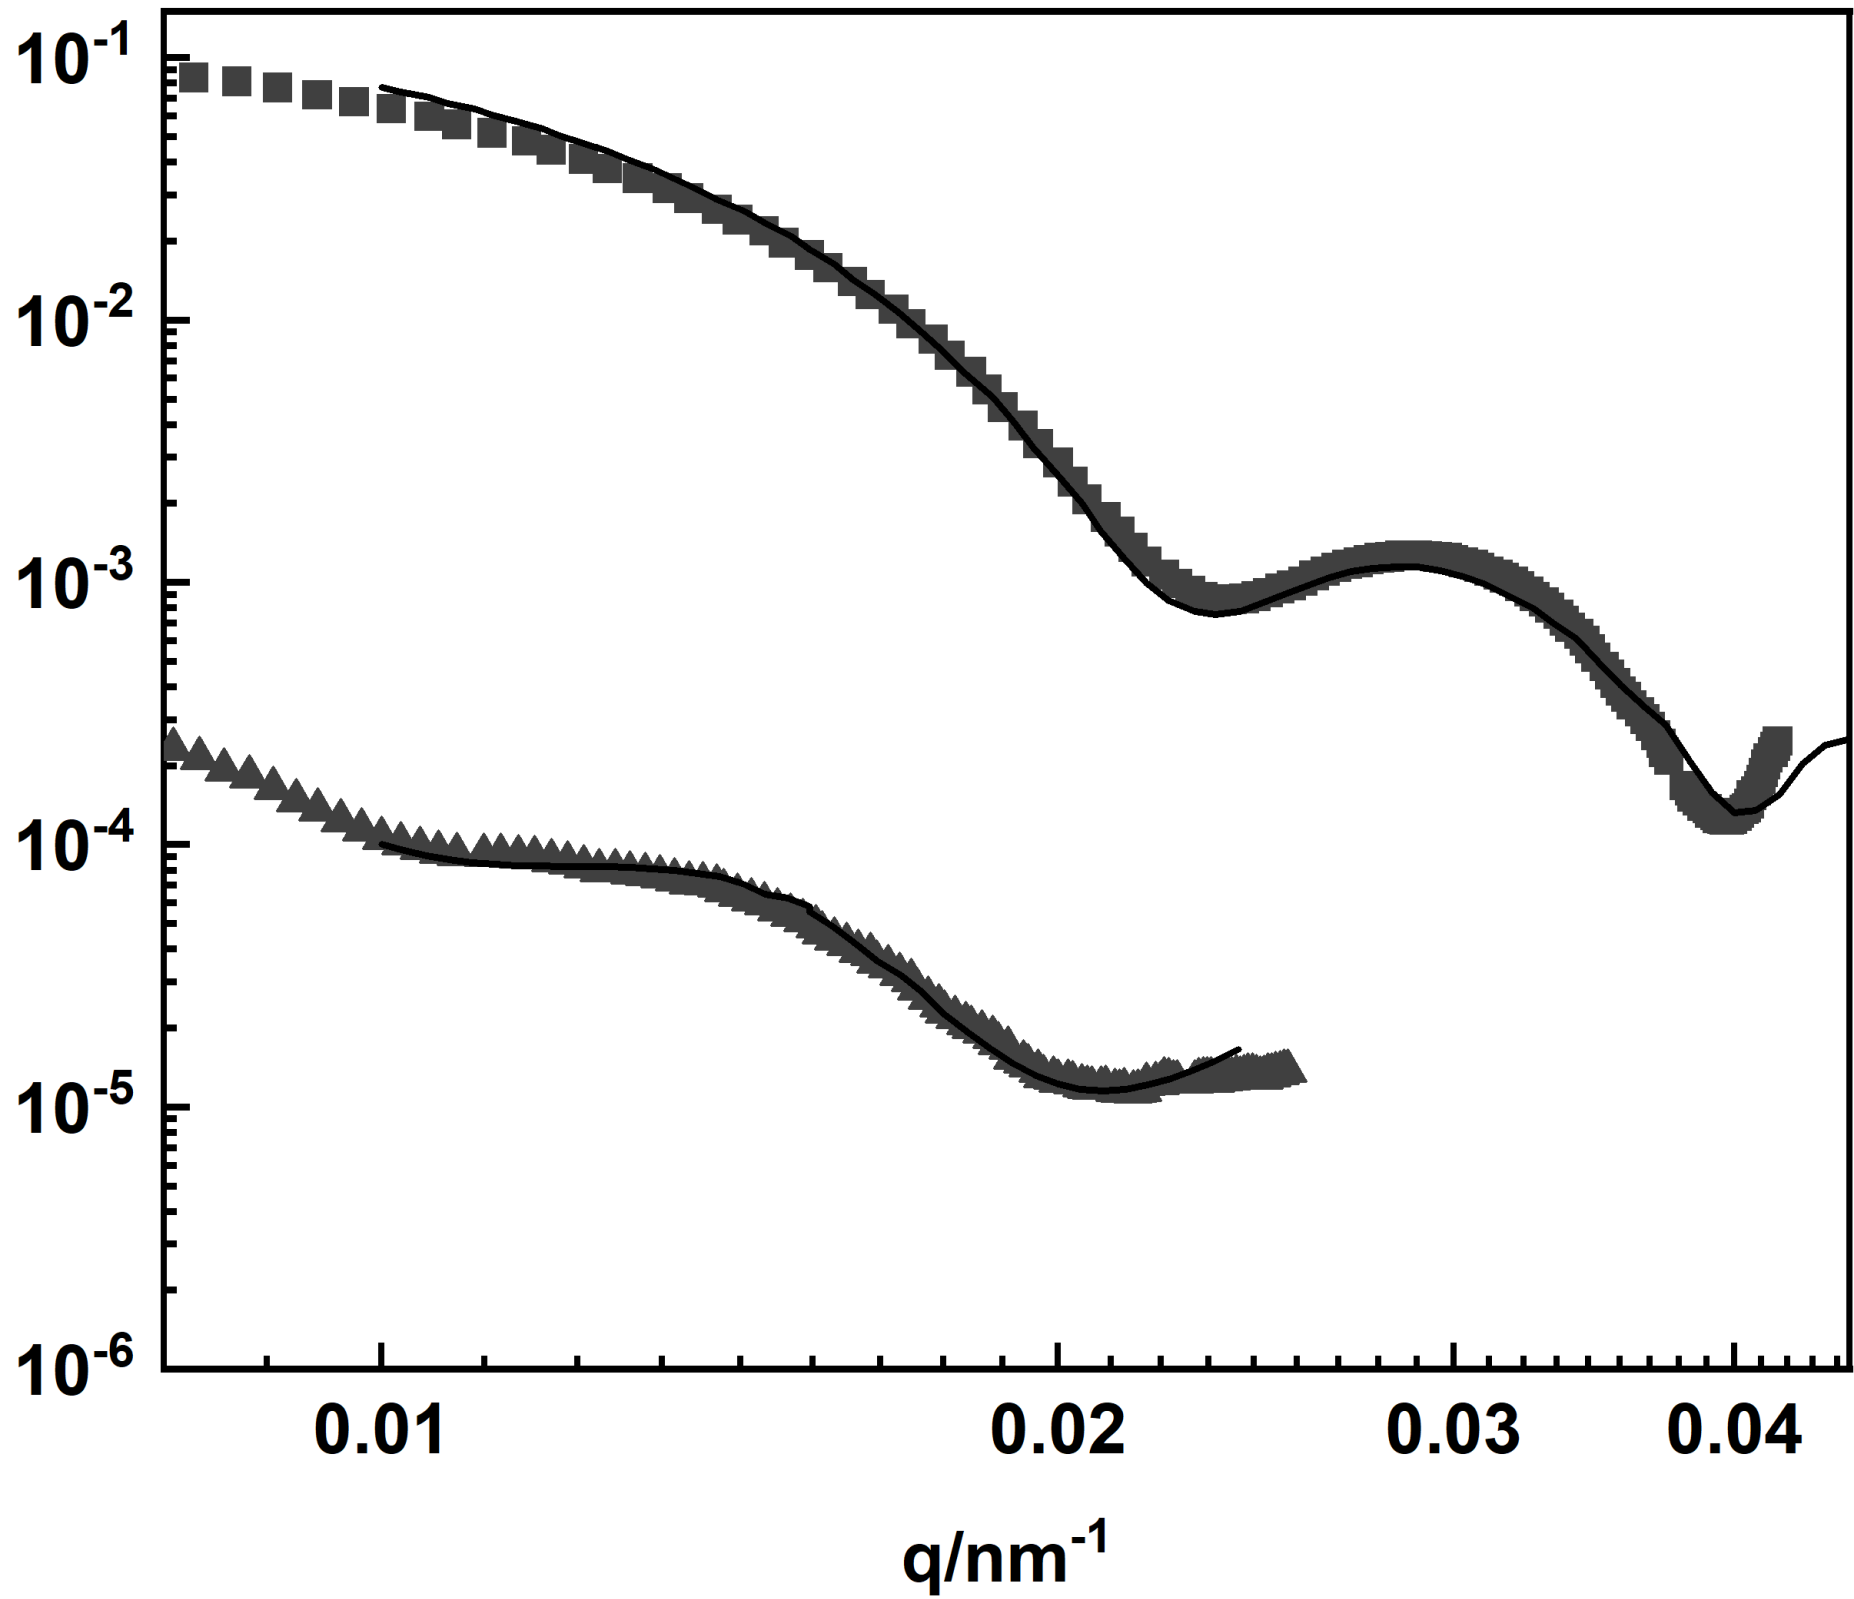

Supplement: d2cp00532h1.zip [file d2cp00532h1.zip]

**a**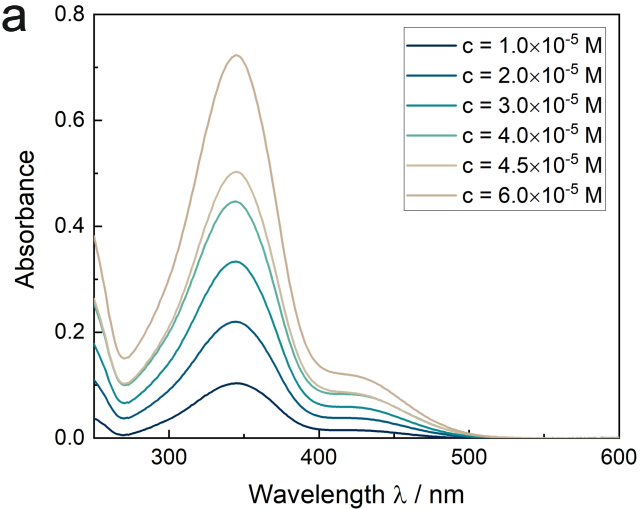**b**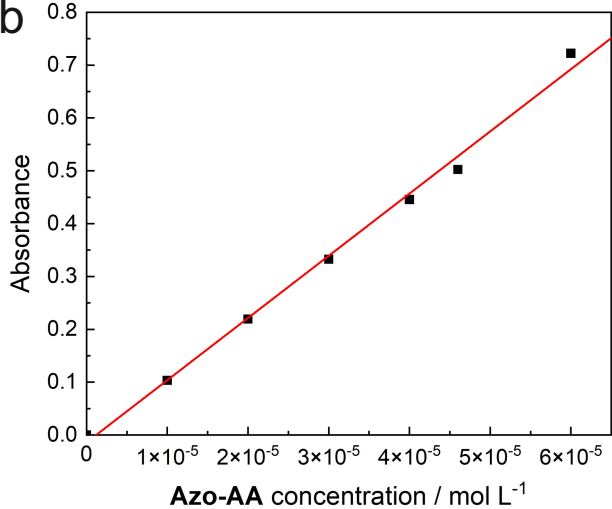

Supplement: d2cp00532h1.zip [file d2cp00532h1.zip]

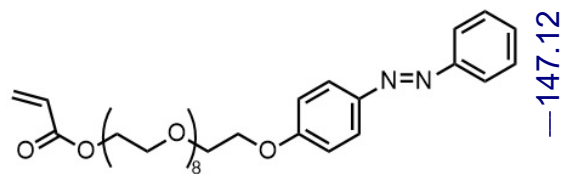

147.12

131.08

130.44

129.08

128.34

124.76

122.61

114.90

70.93

70.68

70.66

70.61

69.67

69.15

67.79

63.74

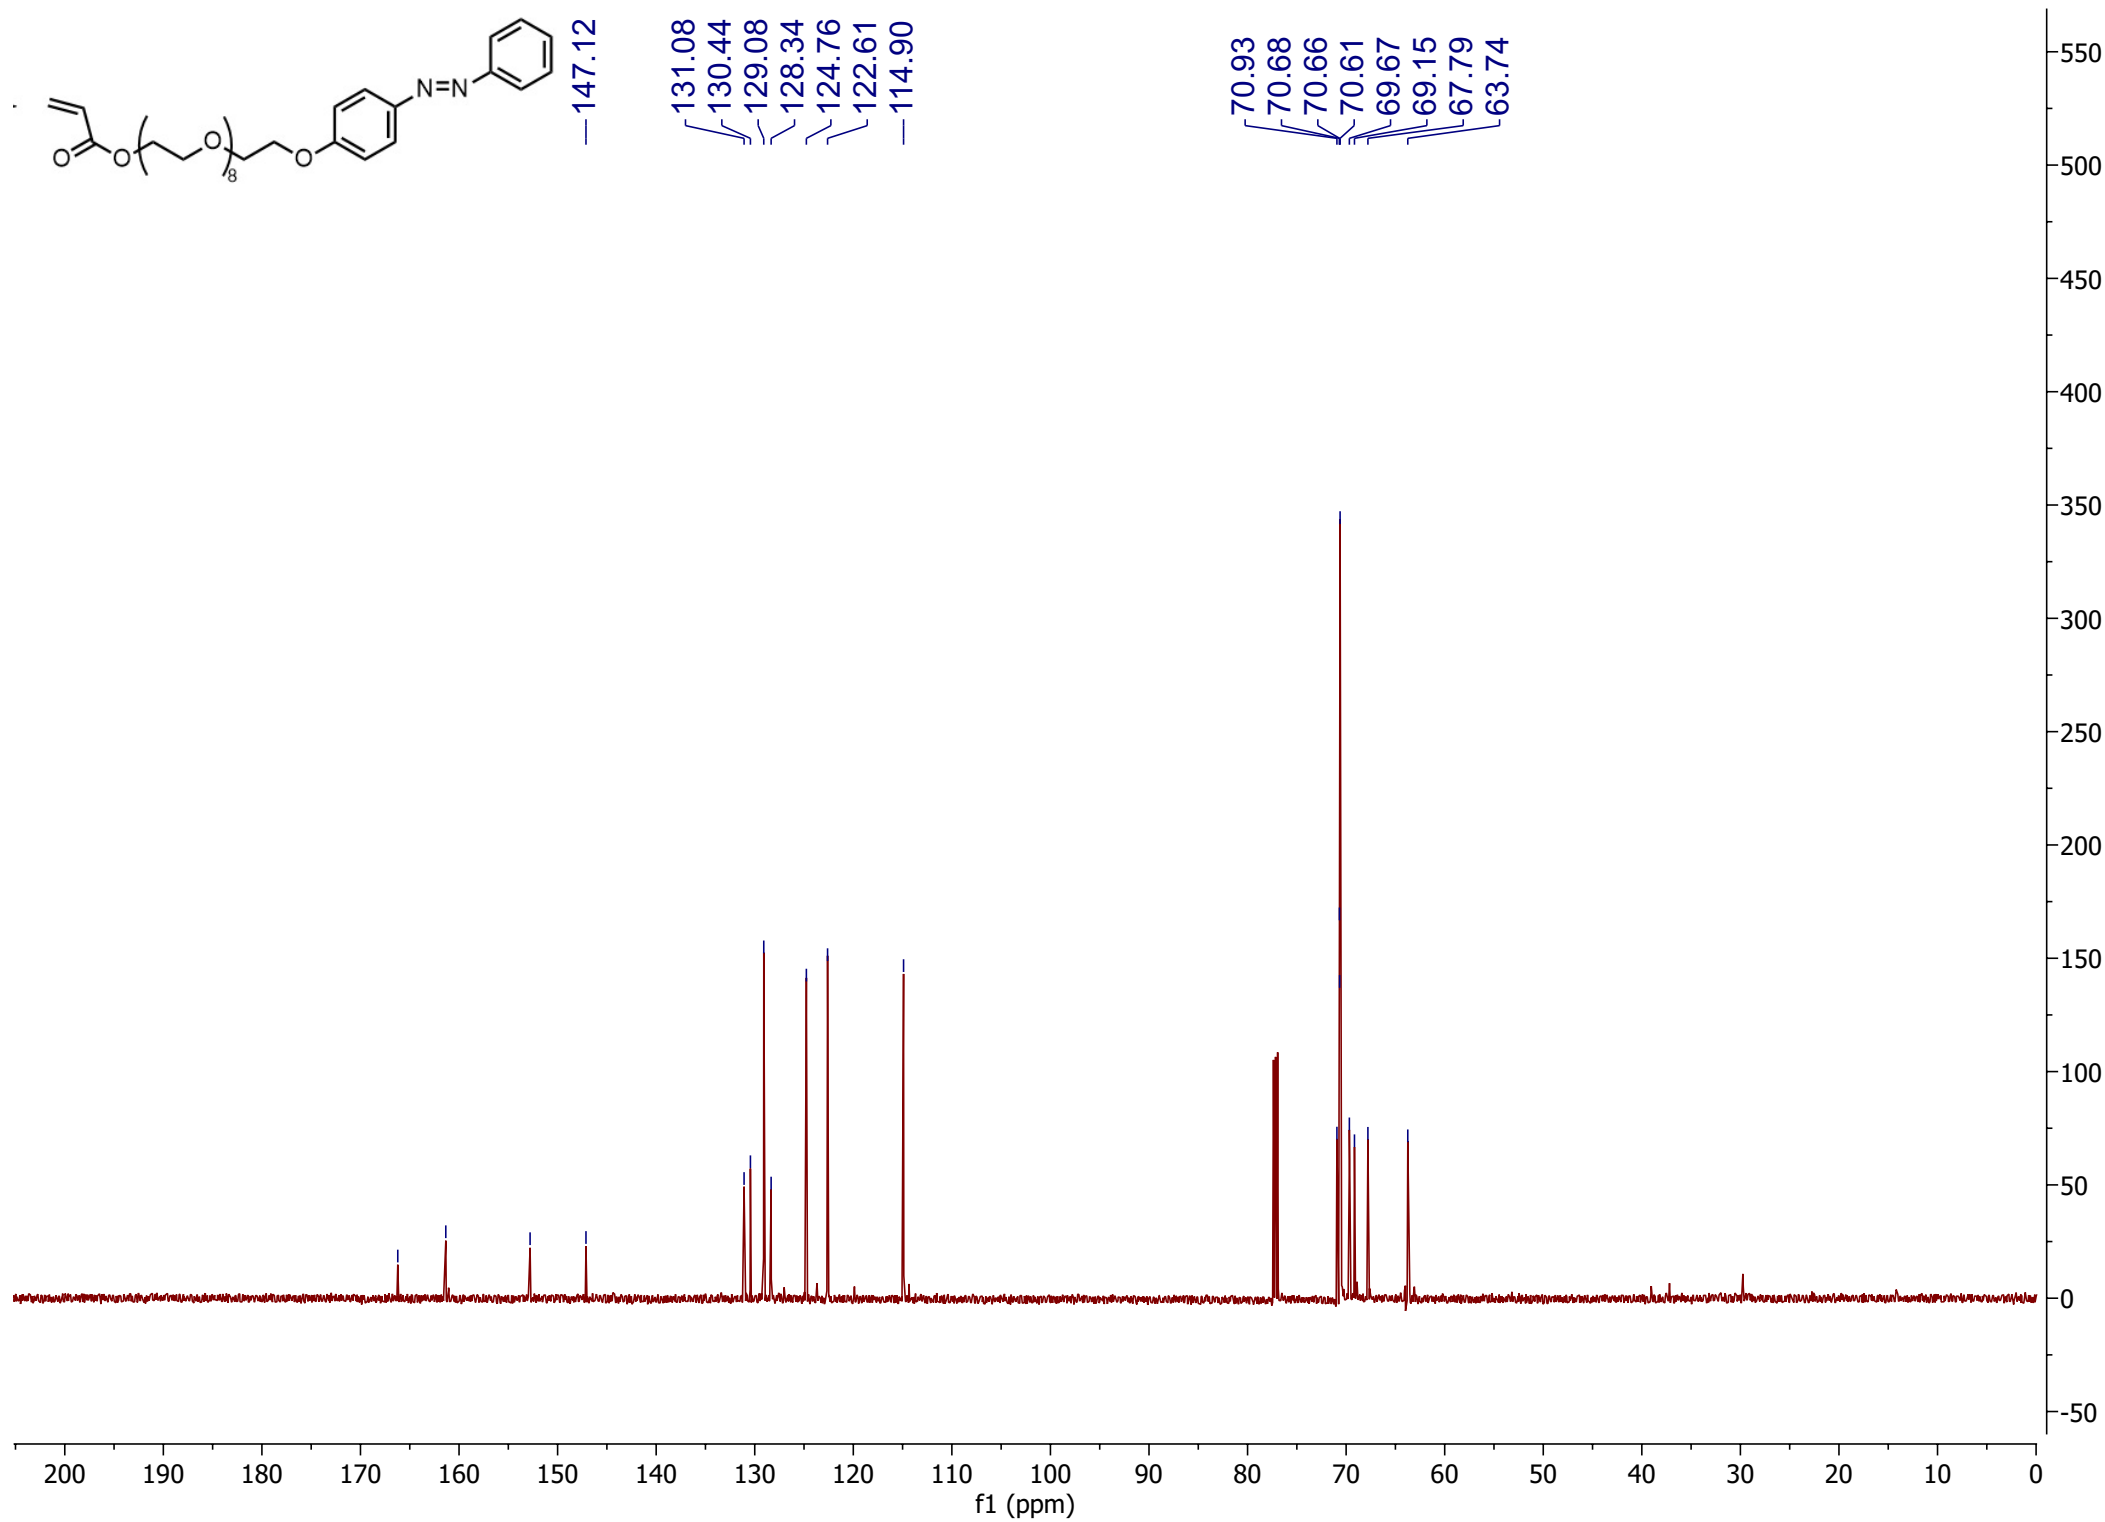

Supplement: d2cp00532h1.zip [file d2cp00532h1.zip]

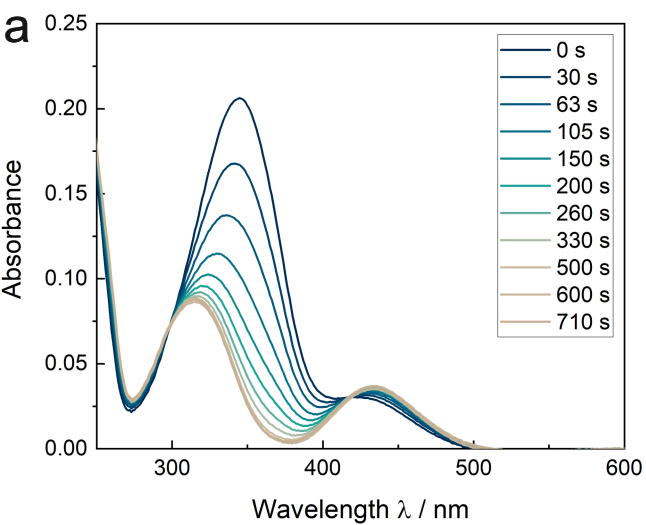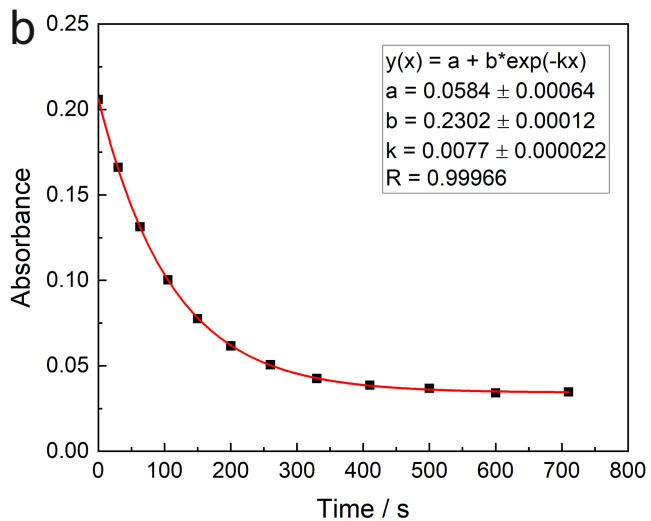

Supplement: d2cp00532h1.zip [file d2cp00532h1.zip]

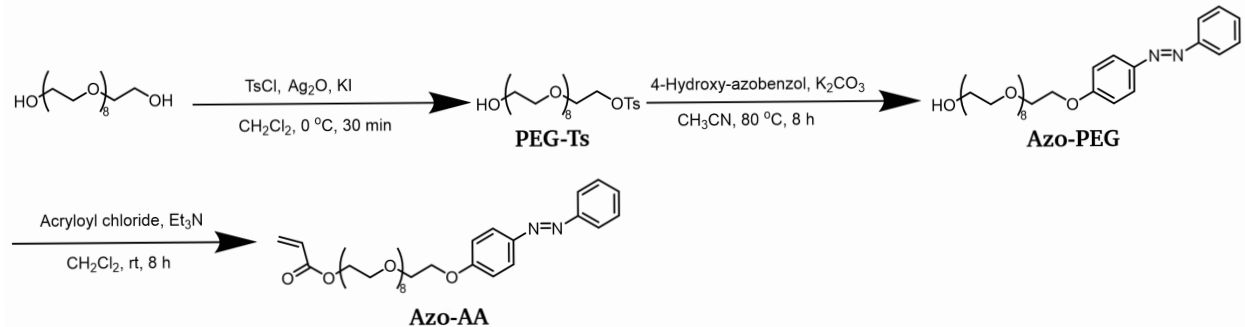

Supplement: d2cp00532h1.zip [file d2cp00532h1.zip]

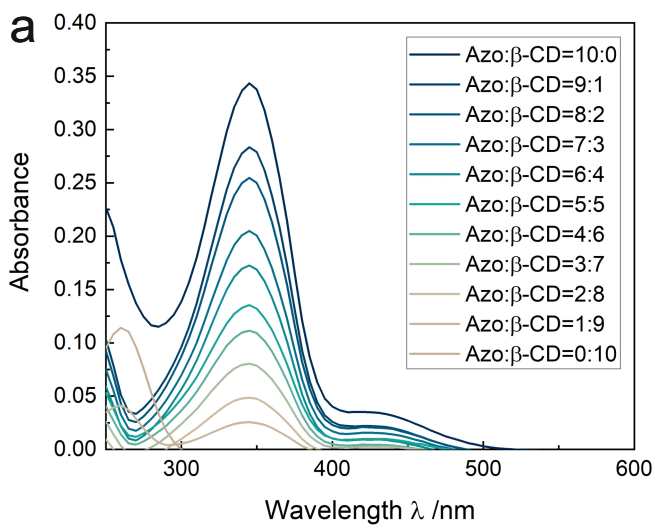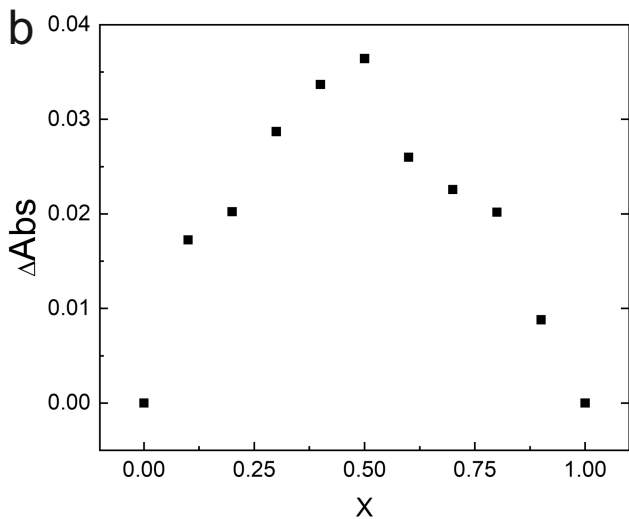

Supplement: d2cp00532h1.zip [file d2cp00532h1.zip]

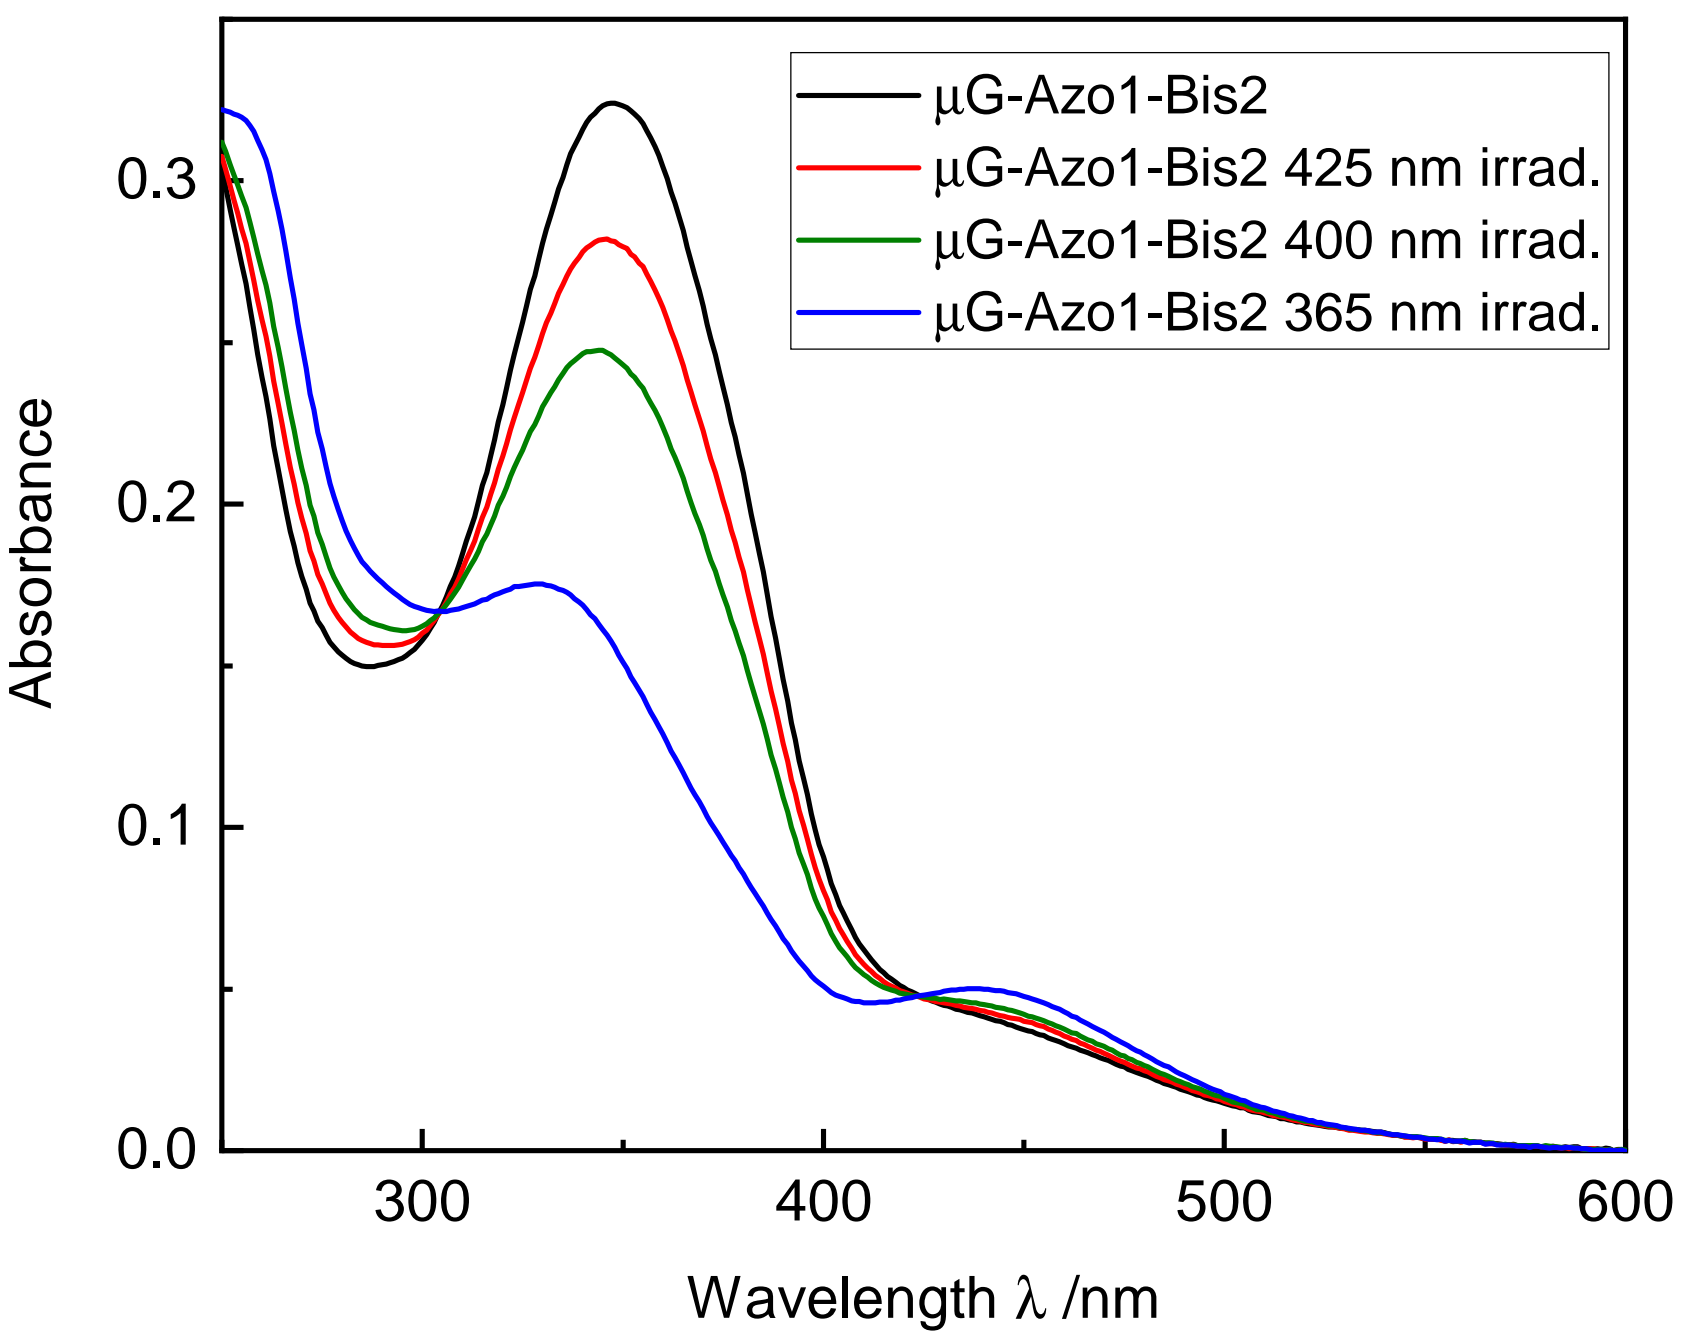

Supplement: d2cp00532h1.zip [file d2cp00532h1.zip]

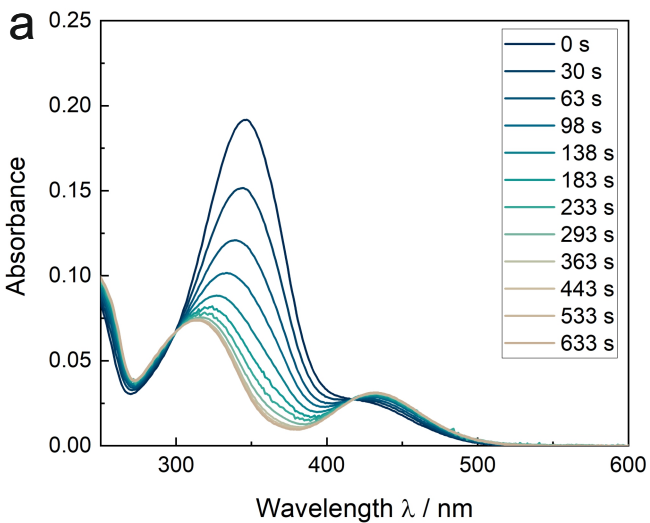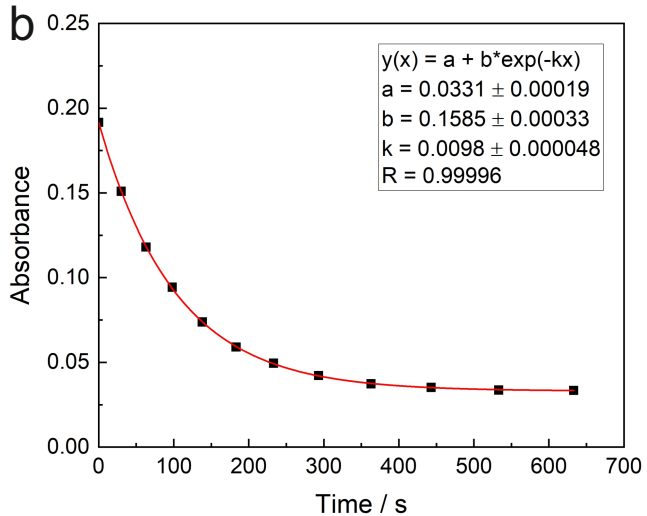

Supplement: d2cp00532h1.zip [file d2cp00532h1.zip]

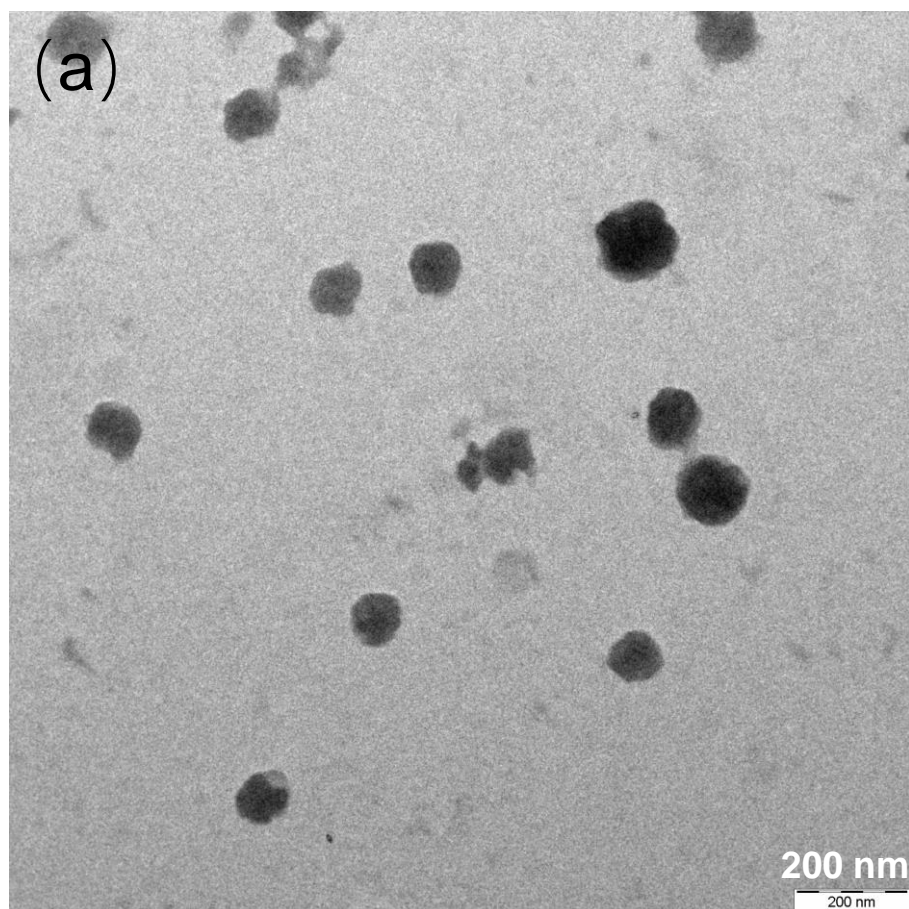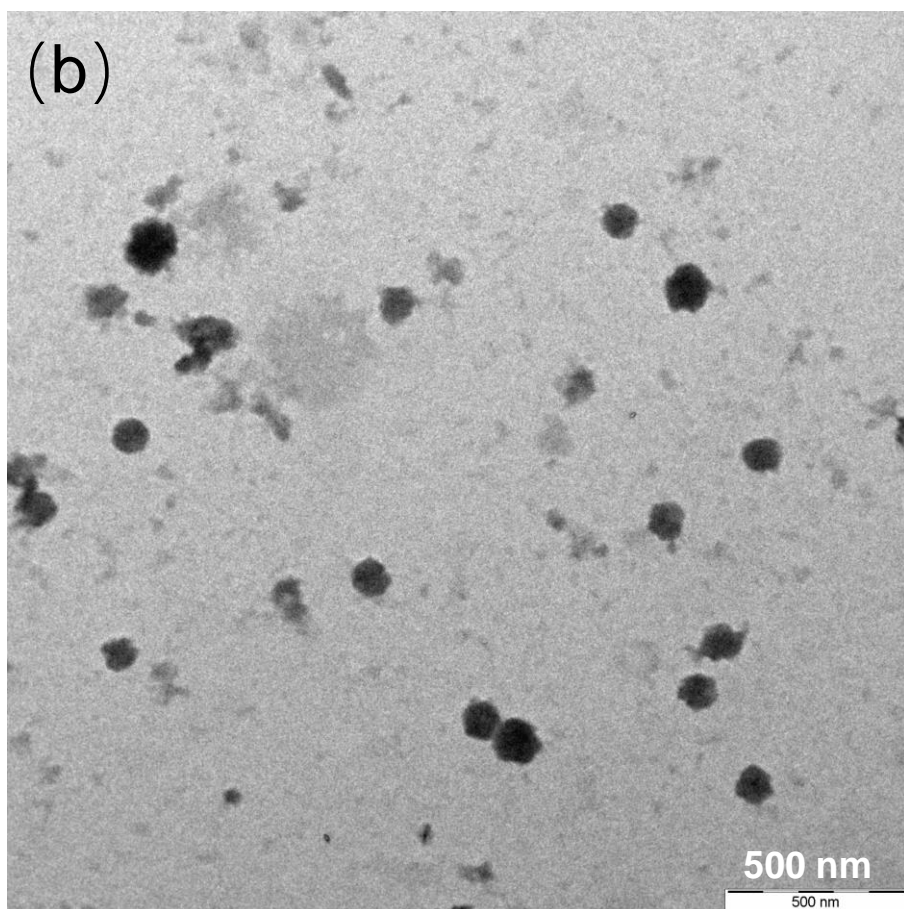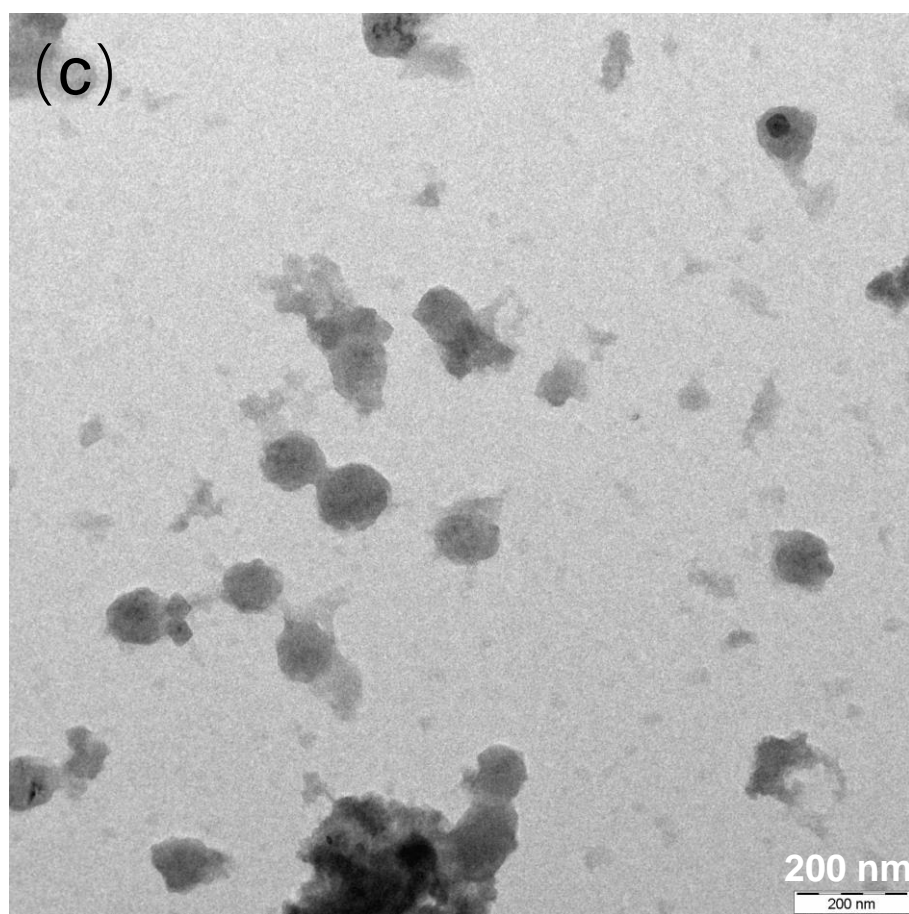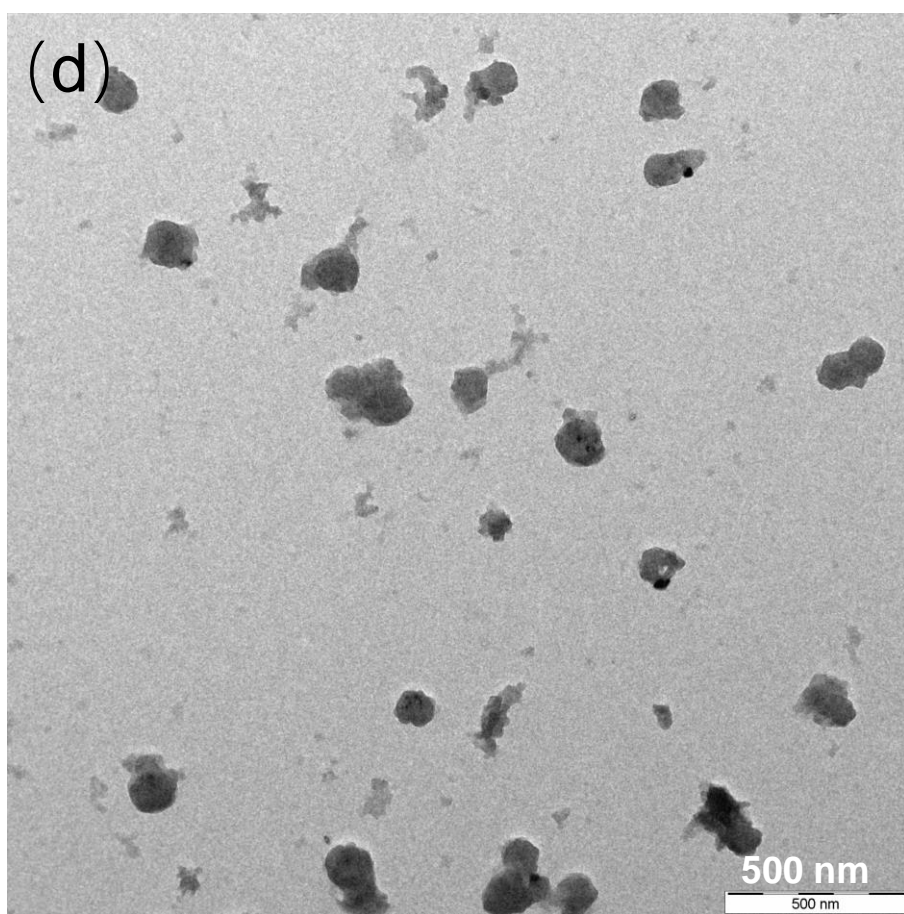

Supplement: d2cp00532h1.zip [file d2cp00532h1.zip]

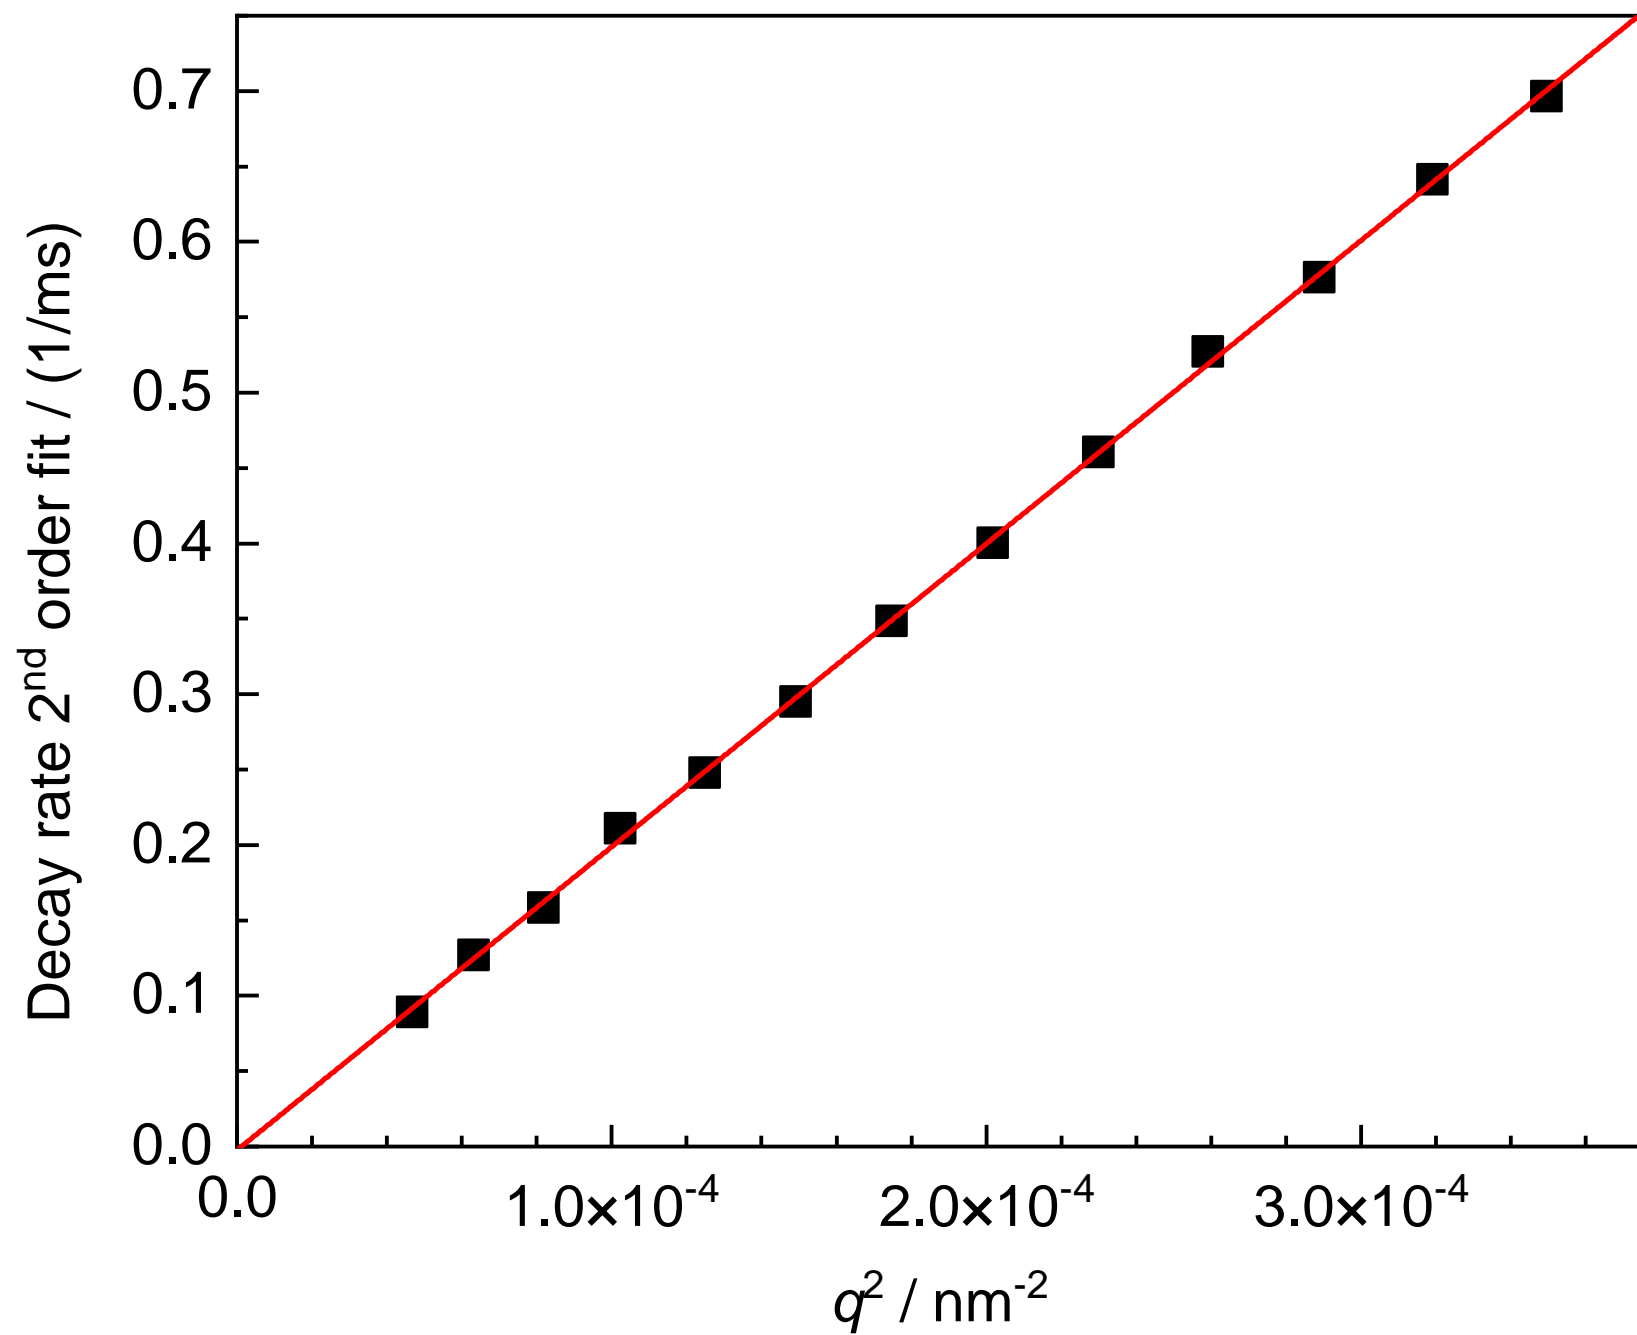

Supplement: d2cp00532h1.zip [file d2cp00532h1.zip]

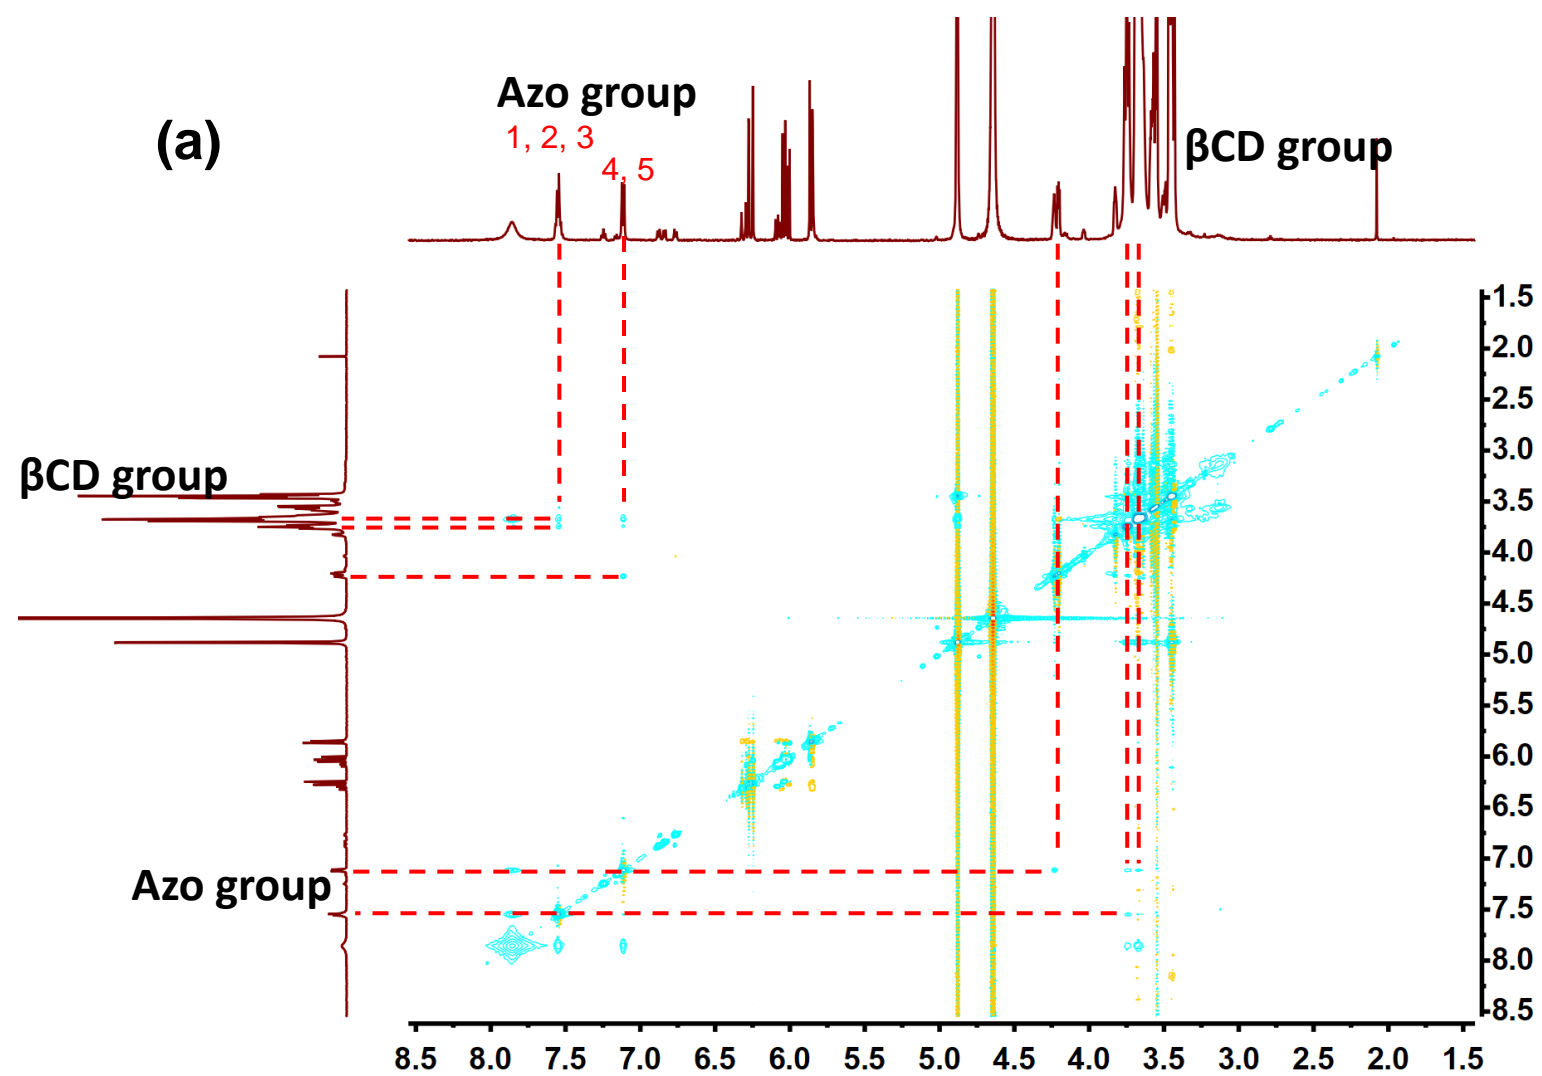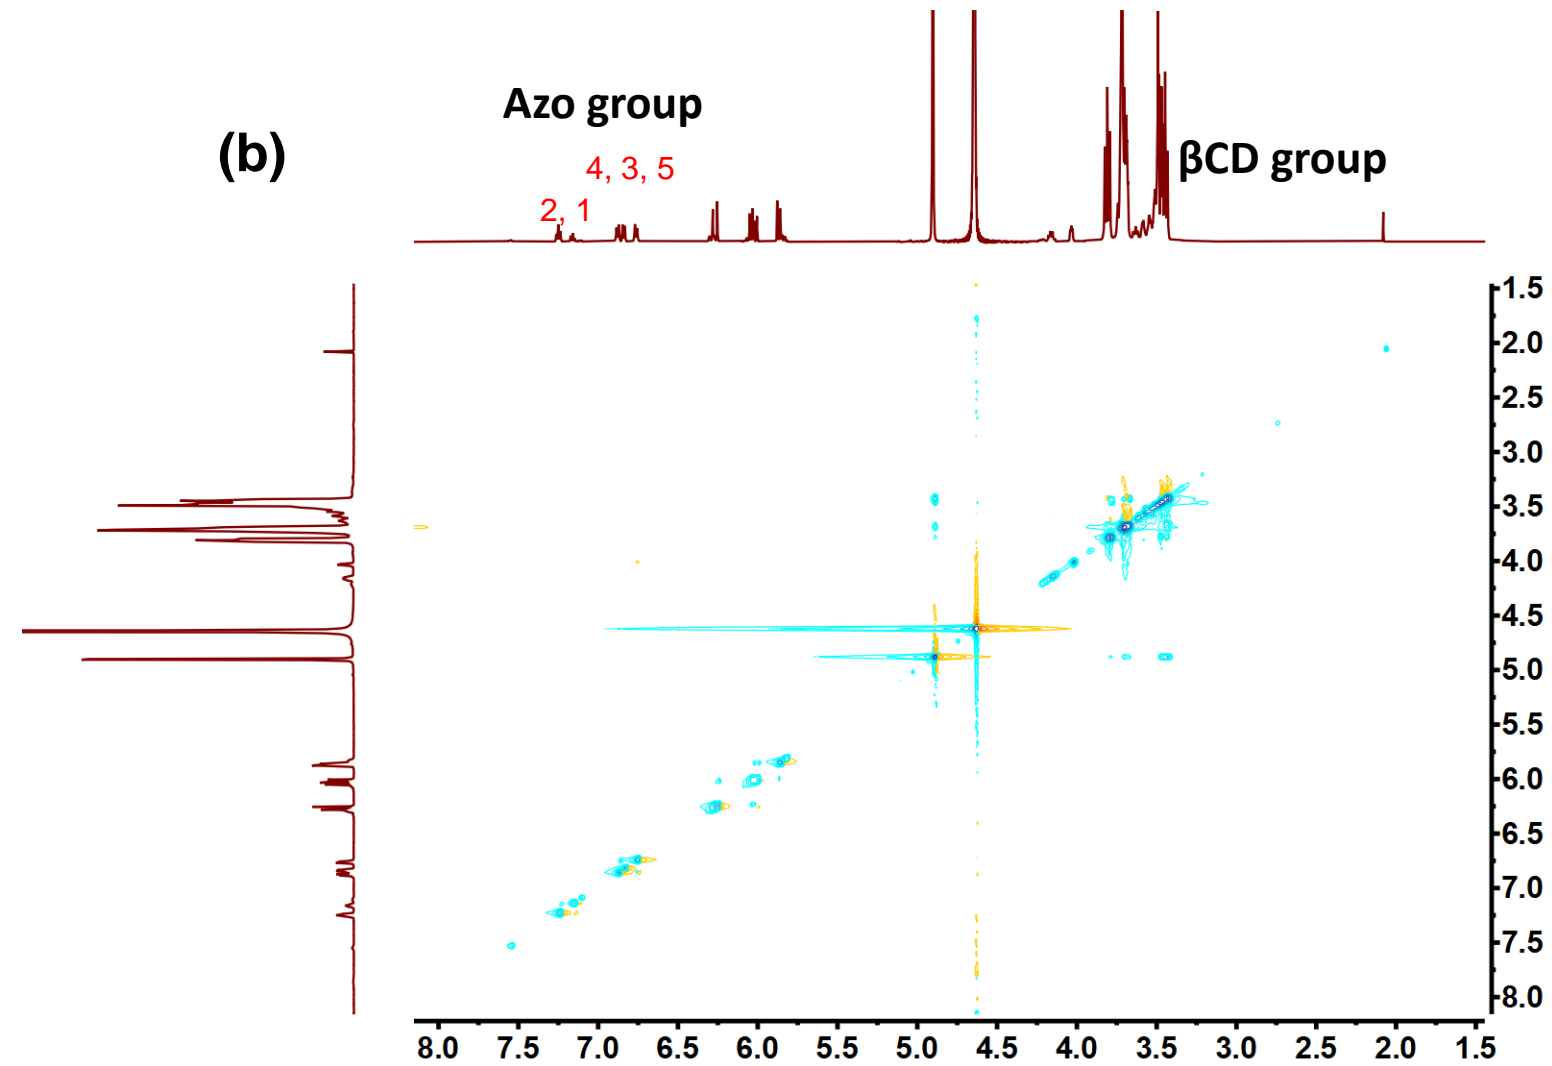

Supplement: d2cp00532h1.zip [file d2cp00532h1.zip]

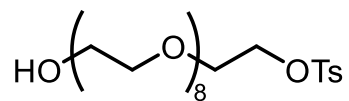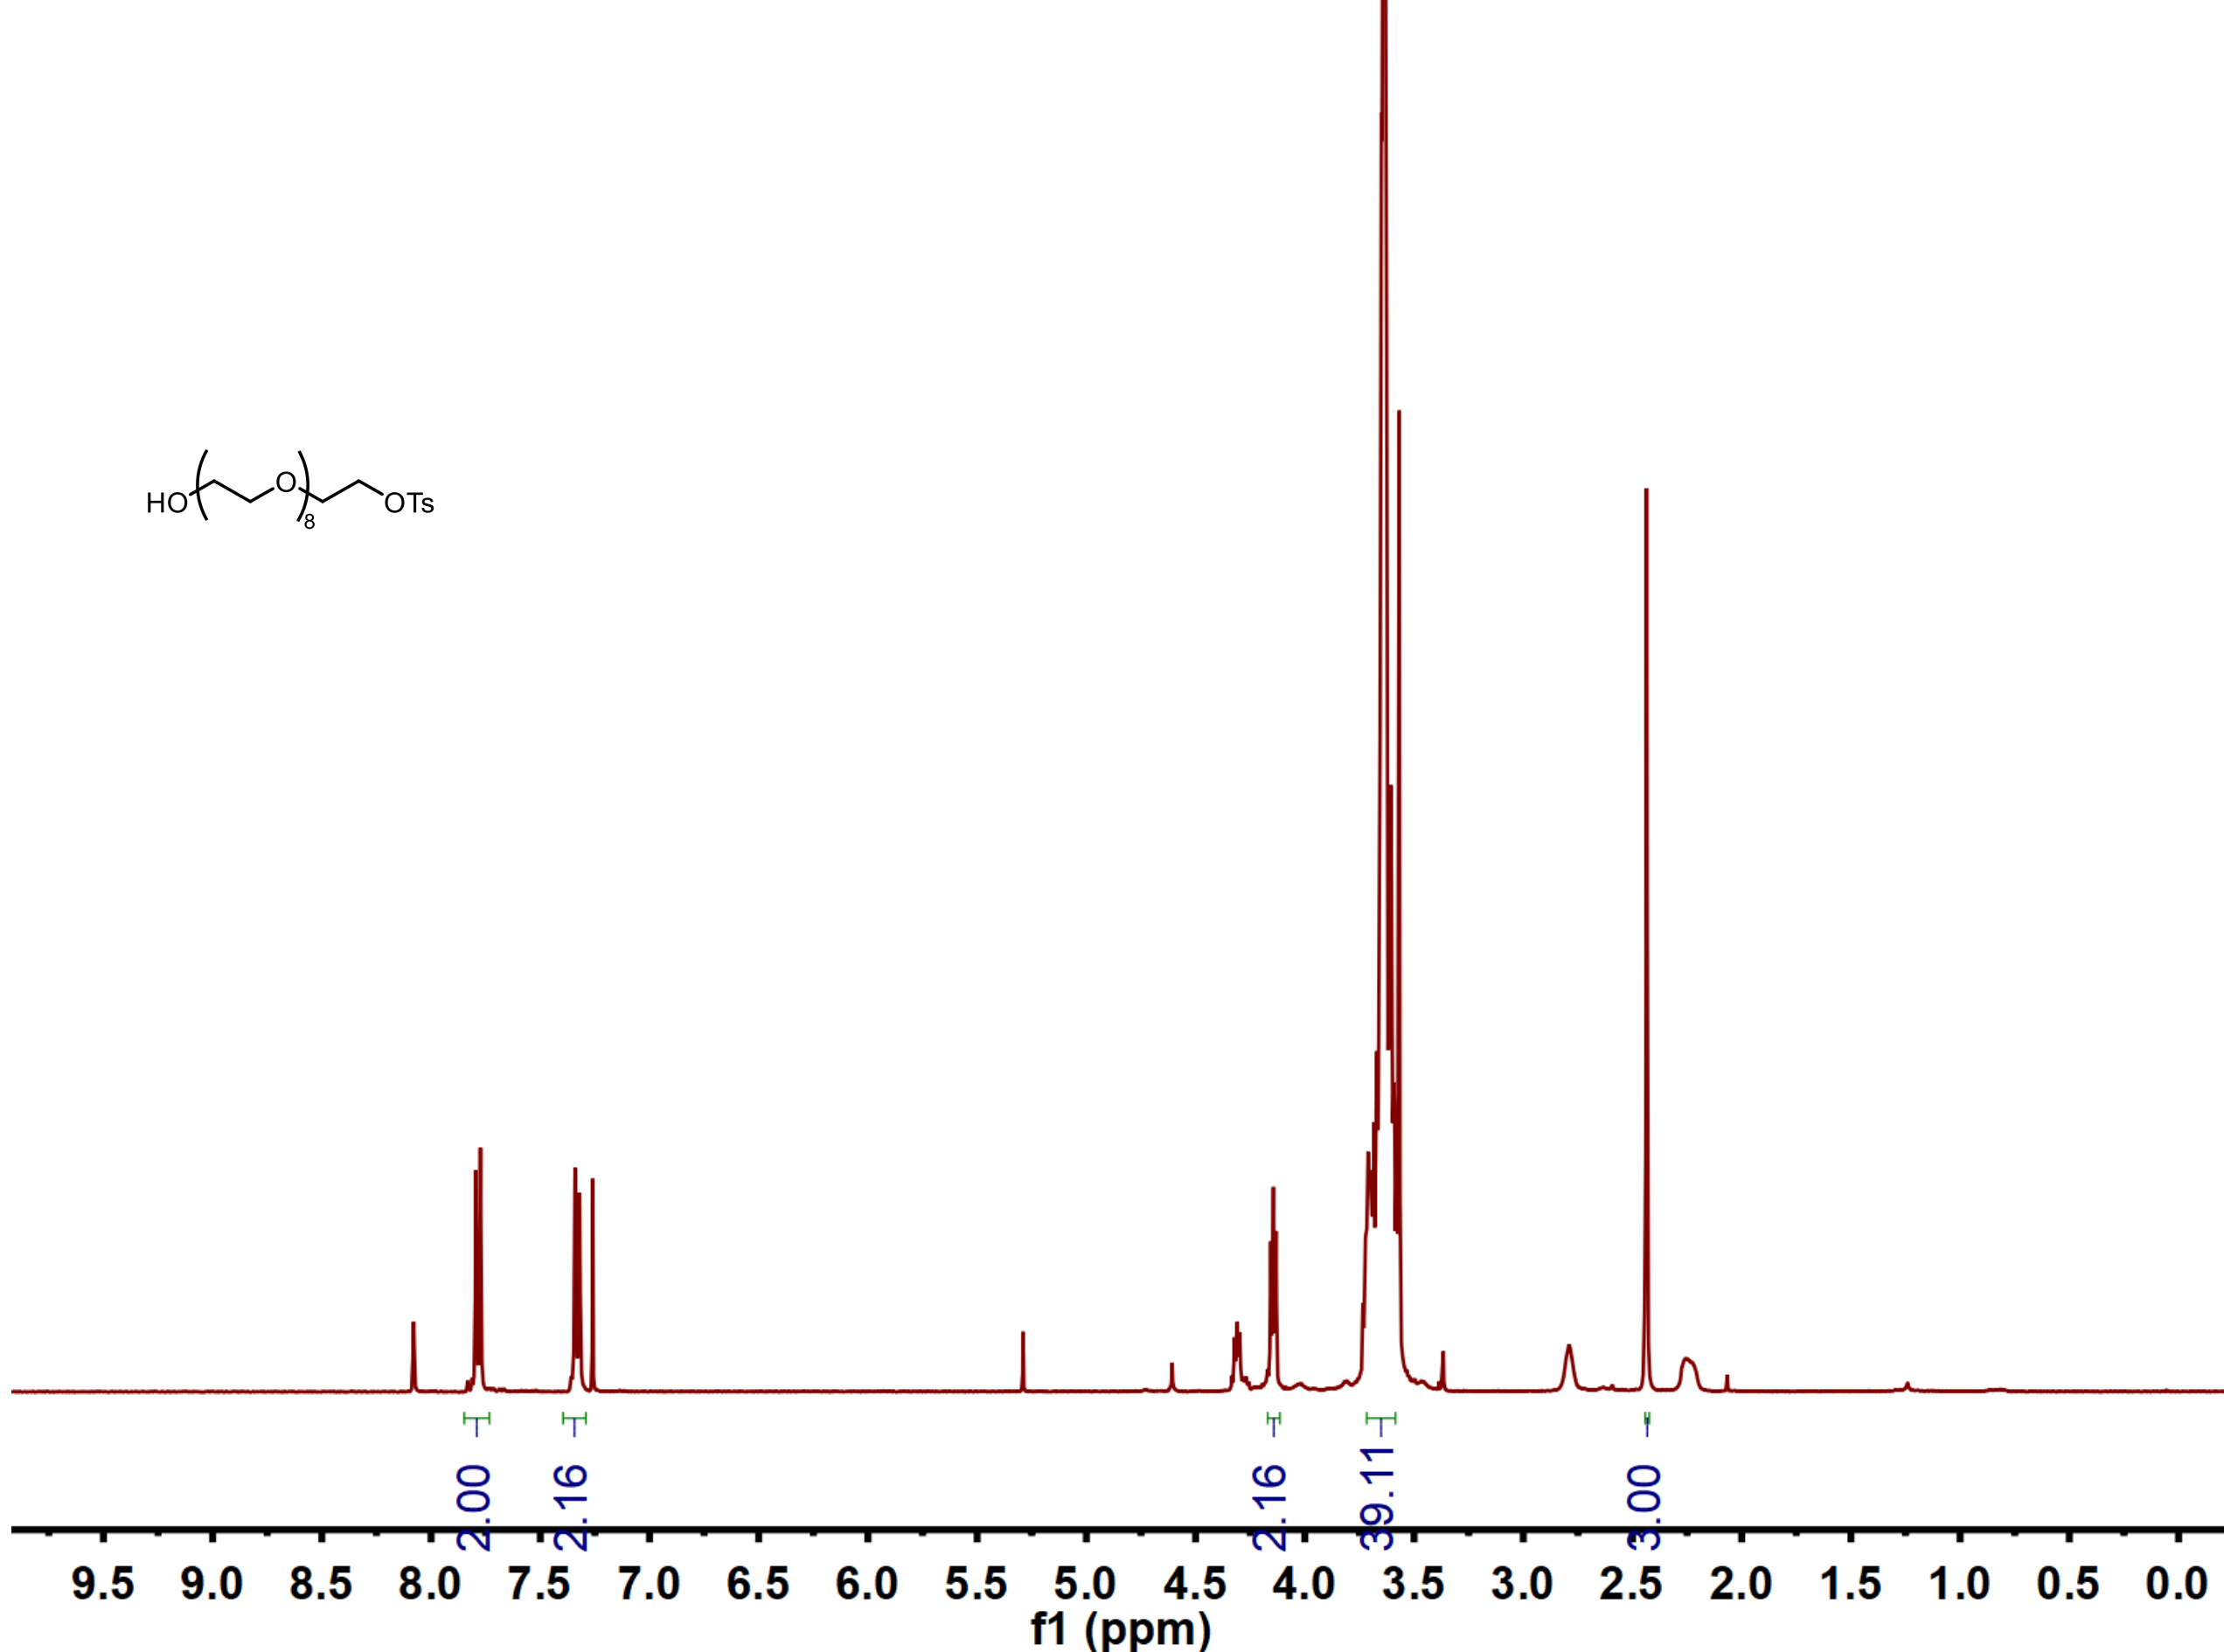

Supplement: d2cp00532h1.zip [file d2cp00532h1.zip]

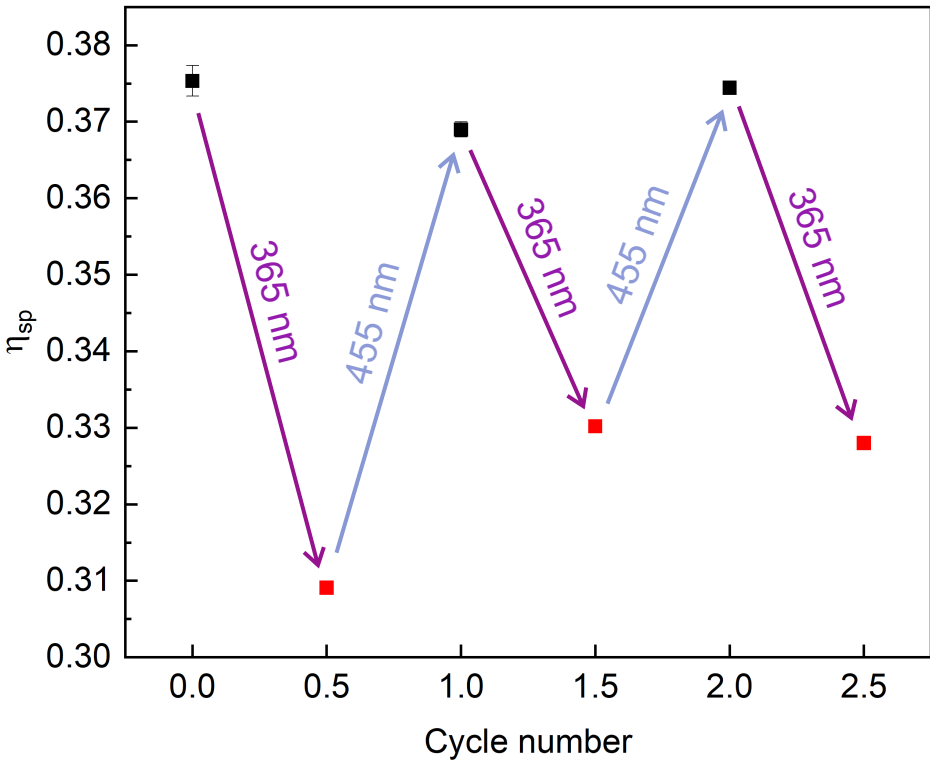

Supplement: d2cp00532h1.zip [file d2cp00532h1.zip]

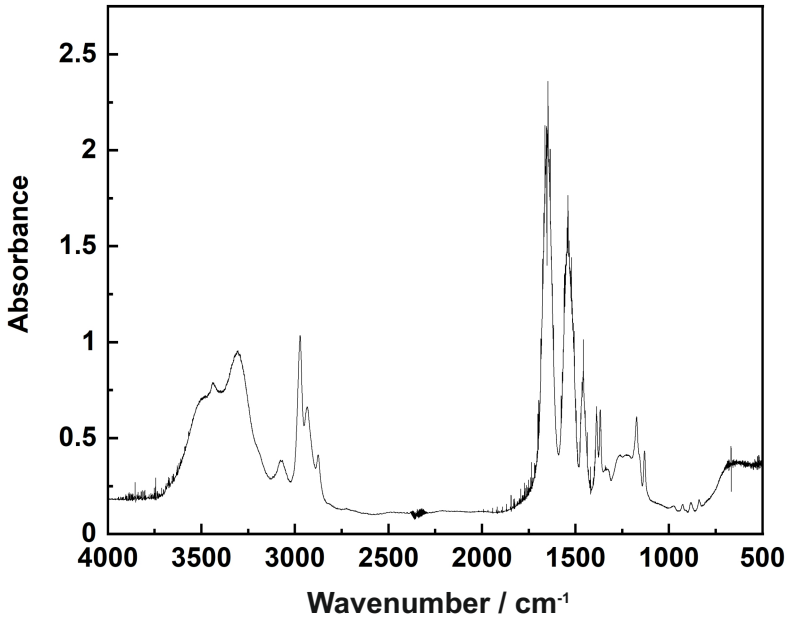

Supplement: d2cp00532h1.zip [file d2cp00532h1.zip]

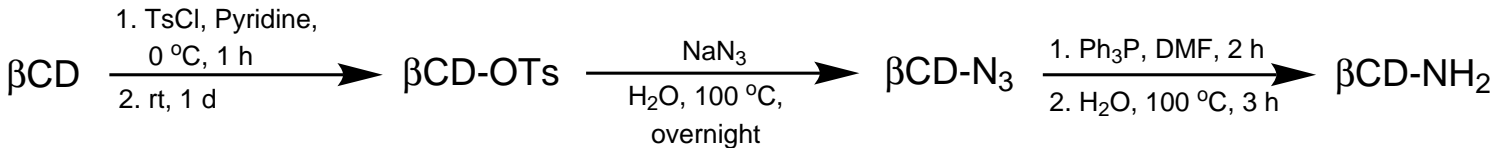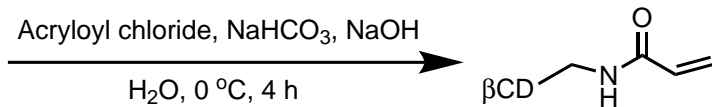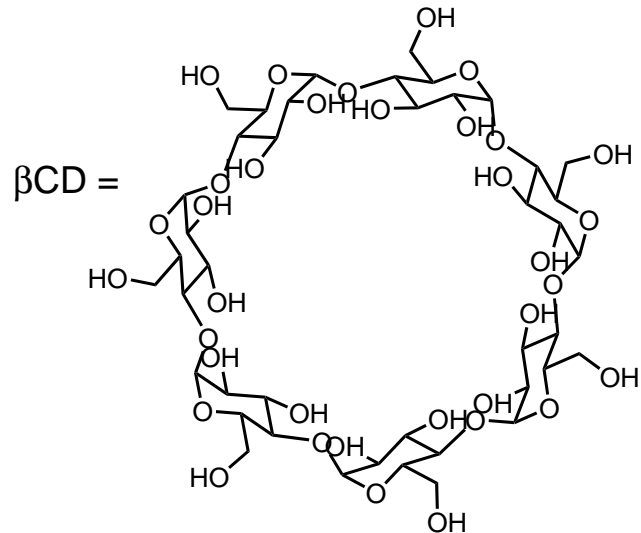

Supplement: d2cp00532h1.zip [file d2cp00532h1.zip]

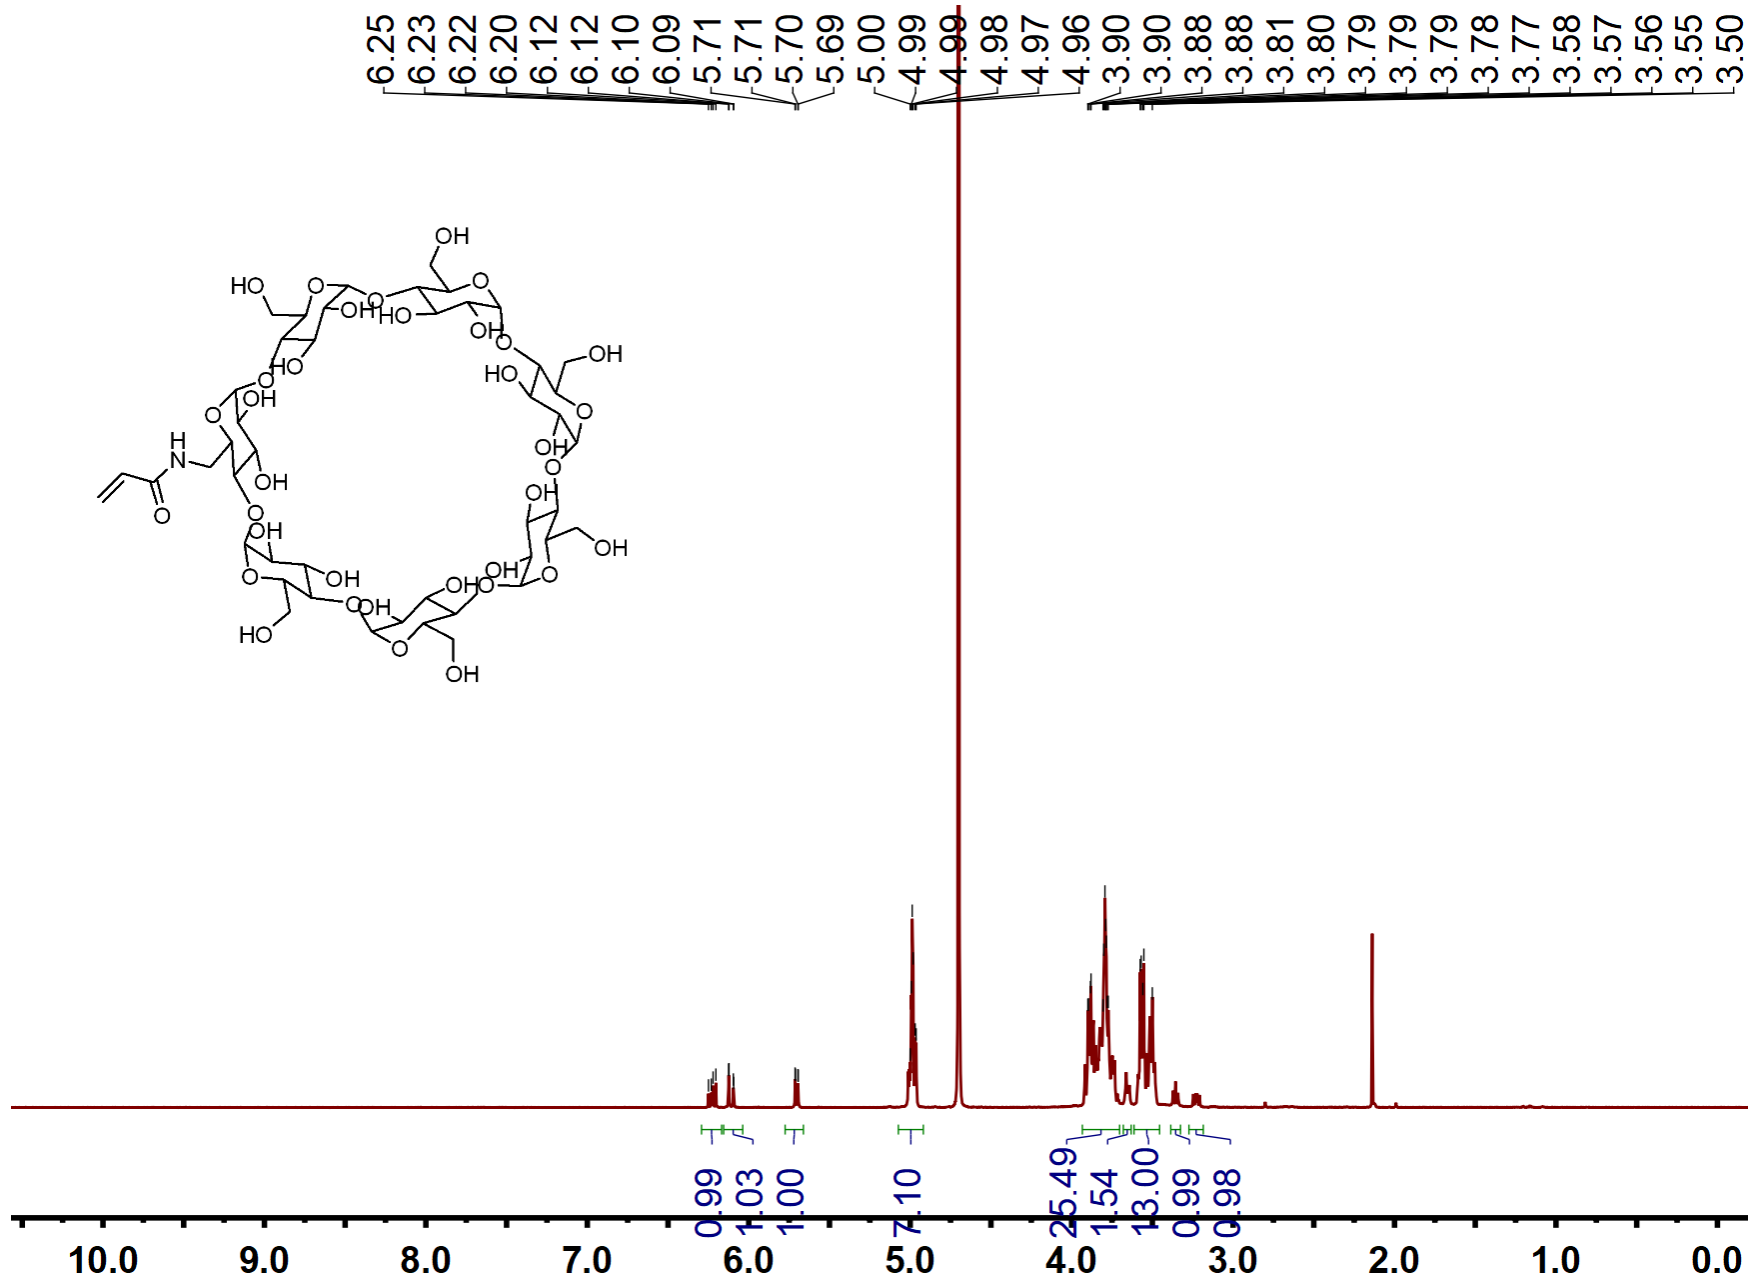

Supplement: d2cp00532h1.zip [file d2cp00532h1.zip]

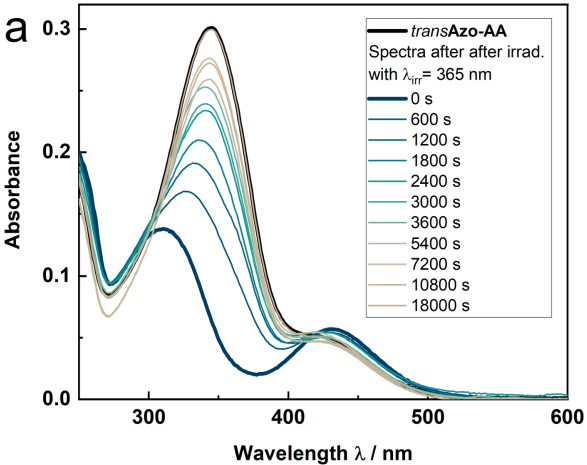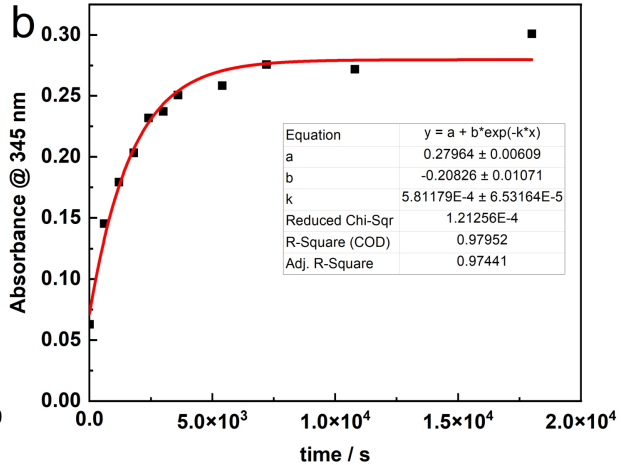

Supplement: d2cp00532h1.zip [file d2cp00532h1.zip]

Guinier  $[\ln(kc/R)] \times 10$

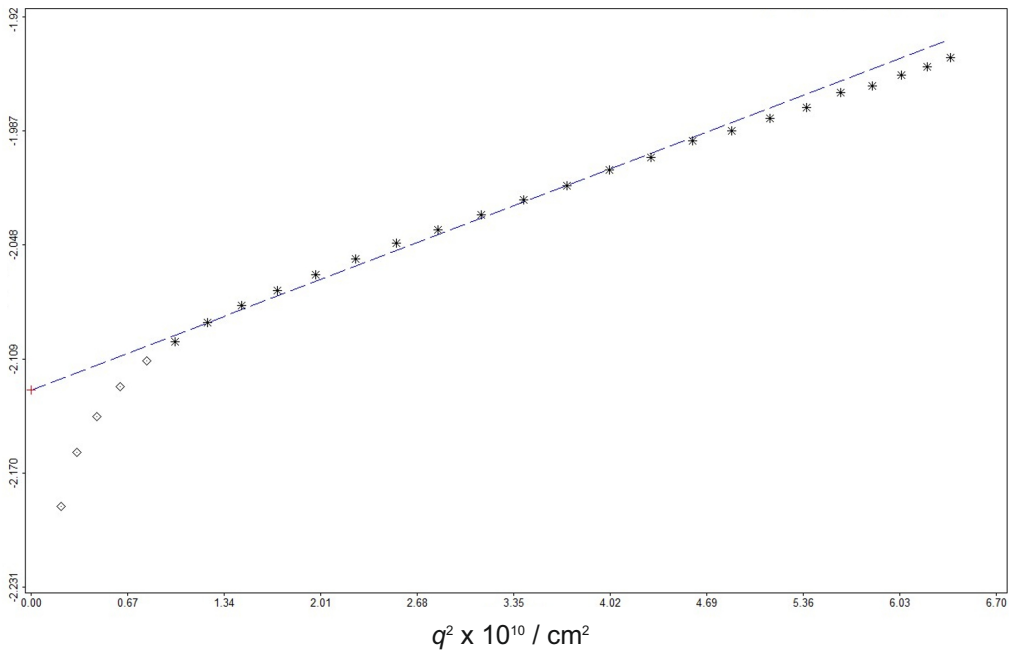

Supplement: d2cp00532h1.zip [file d2cp00532h1.zip]

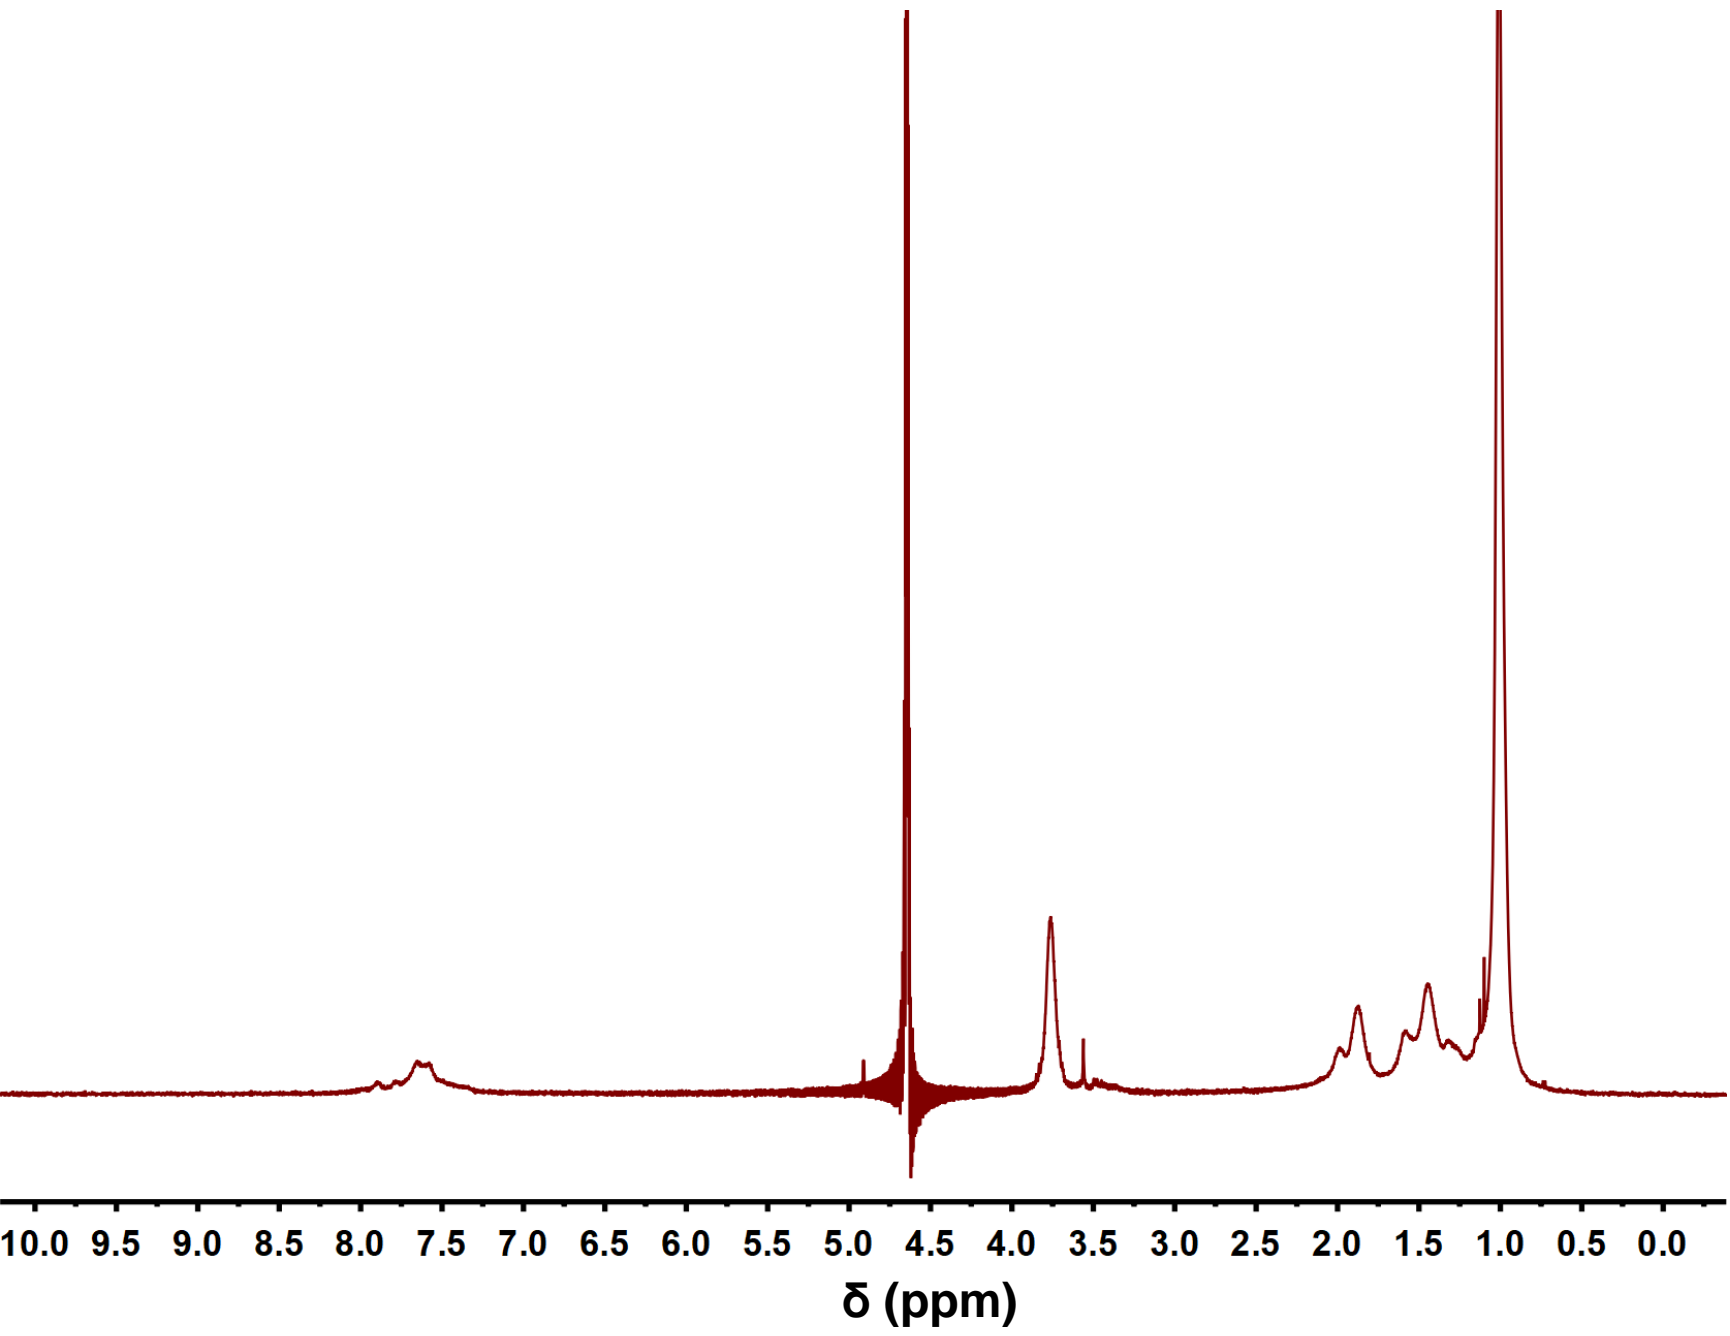

Supplement: d2cp00532h1.zip [file d2cp00532h1.zip]
